1 **Gap junction protein INNEXIN2 modulates the period of free-running**  
2 **rhythms in *Drosophila melanogaster***

3

4 Aishwarya Ramakrishnan<sup>1</sup> and Vasu Sheeba<sup>1\*</sup>

5

6 Behavioural Neurogenetics Laboratory, Neuroscience Unit, Jawaharlal Nehru centre for  
7 Advanced Scientific Research, Jakkur, Bangalore-560064, Karnataka, India.

8

9

10

11

12

13

14 Running title: *Innexin2* modulates free-running period in *D. melanogaster*

15

16

17

18

19

20

21

22 \*Correspondence: Vasu Sheeba, Behavioural Neurogenetics Laboratory, Neuroscience Unit,  
23 Jawaharlal Nehru Centre for Advanced Scientific Research, Jakkur, Bangalore-560064,  
24 Karnataka, India. E-mail: [sheeba@jncasr.ac.in](mailto:sheeba@jncasr.ac.in)

25

26

27

28

29

## 30 **Abstract**

31 The circadian neuronal circuit of *Drosophila melanogaster* is made up of about 150 neurons,  
32 distributed bilaterally and distinguished into 7 clusters. Multiple lines of evidence suggest  
33 that coherent rhythms in behaviour are brought about when these clusters function as a  
34 network. Although chemical modes of communication amongst circadian neurons have  
35 been well-studied, there has been no report of communication via electrical synapses made  
36 up of gap junctions. Here, we report for the first time that gap junction proteins - Innexins  
37 play crucial roles in determining the period of free-running activity rhythms in flies. Our  
38 experiments reveal the presence of gap junction protein INNEXIN2 in the ventral lateral  
39 neurons. RNA-interference based knockdown of its expression in circadian pacemakers  
40 slows down the speed of locomotor activity rhythm. Concomitantly, we find alterations in  
41 the oscillation of a core-clock protein PERIOD and in the output molecule Pigment  
42 Dispersing Factor in the circadian pacemaker neuron network.

43

44

45 Keywords: Gap junctions, *Innexins*, PERIOD, Pigment Dispersing Factor, *Drosophila*,  
46 membrane potential, activity-rest.

47

48

## 49 **Introduction**

50 *Drosophila* has been widely used as a model organism in circadian biology because of its  
51 robust and easily quantifiable behaviours and relatively few number of neurons controlling  
52 them (Allada & Chung, 2010). The adult *Drosophila* circadian circuit is composed of about  
53 150 neurons distributed bilaterally in the brain. Based on their location, they can be divided

54 into lateral neurons (LN) and dorsal neurons (DN). The lateral neurons are further divided  
55 into the small ventral lateral neurons (s-LNv), large ventral lateral neurons (l-LNv), the  
56 lateral dorsal neurons (LNd) and the lateral posterior neurons (LPN). The dorsal cluster of  
57 neurons are further divided into 3 groups as dorsal neurons 1-3 (DN1-3) (reviewed in  
58 Sheeba, 2008).

59 Each of these neurons have a ticking molecular clock composed of a self-sustained  
60 transcriptional translational feedback loop (TTFL) made up of four core clock genes *Clock*,  
61 *Cycle*, *Period* and *Timeless*. The period of these molecular oscillations in mRNA and protein  
62 within the pacemaker circuit in the fly brain mirror the period of rhythmic activity-rest  
63 behaviour reviewed in (Hardin, 2005). Although molecular circadian clocks in individual  
64 neurons can be thought of as ticking cell autonomously due to the precisely timed cycling of  
65 their mRNA and proteins, one interesting question that remains to be fully understood is  
66 how these distinct neuronal clusters, with distinct intrinsic periodicities (Yoshii et al., 2009)  
67 together bring about one coherent period of the behavioural activity rhythm. Early studies  
68 of *Drosophila* clock neuronal network have shown that under constant darkness and  
69 constant temperature (DD 25 °C), s-LNv neurons and clocks in these cells are necessary and  
70 sufficient for the persistence of activity-rest rhythms (Helfrich-Förster, 1998, Renn et al.,  
71 1999). s-LNv release neuropeptide Pigment Dispersing factor (PDF) in the dorsal part of the  
72 brain via their projections in a time-of-day dependent manner (Park et al., 2000). Lack of  
73 PDF results in arrhythmicity of activity-rest rhythms under constant conditions (Renn et al.,  
74 1999) suggesting that PDF is necessary for persistence of rhythms. PDF receptor (*PdfR*) is  
75 widely distributed in most clock neurons in the circuit (Hyun et al., 2005, Mertens et al.,  
76 2005), most of them being responsive to PDF (Shafer et al., 2008), thus establishing its role  
77 as an important synchronizing factor in the circadian circuit. Apart from PDF, several other

78 neuropeptides and neurotransmitters have been implicated to play diverse roles in  
79 communication among circadian neurons, although none of them have been shown to play  
80 as prominent roles as PDF (reviewed in Beckwith & Ceriani, 2015).

81 Across organisms, and behaviours, most studies have focused on the role played by  
82 chemical synapses among neurons in a circuit, even though electrical and chemical synapses  
83 have been known to co-exist in neural networks of most organisms (reviewed in Pereda,  
84 2014, Nagy et al., 2018). Gap junctions are tightly coupled clusters of proteins which form  
85 intercellular membrane spanning channels connecting the cytoplasm of adjacent cells.  
86 These channels facilitate electrical coupling of adjacent cells through diffusion of ions,  
87 metabolites and cyclic nucleotides (Faber & Pereda, 2018). Three gene families are known  
88 to form gap-junction channels. *Connexins* form gap junctions in chordates; *Innexins* were  
89 identified as the structural proteins of gap junctions in invertebrates and *Pannexins* which  
90 are structurally similar to *Innexins* are found in some invertebrates and chordates and  
91 mostly function as hemichannels (Beyer & Berthoud, 2017). Structurally, gap junction  
92 proteins are four-pass transmembrane (TM) proteins with intracellular N and C termini, two  
93 extracellular loops and one intracellular loop. *Drosophila melanogaster* has eight members  
94 of the *Innexin* family named *Innexin1-8* (reviewed in Bauer et al., 2005). Gap junction  
95 hemichannels can be classified as homomeric or heteromeric, composed of the same or  
96 different classes of *Innexins* respectively. Intercellular channels are called homotypic if each  
97 of the two hemichannels are made of same type of *Innexins* and heterotypic if made of two  
98 different hemichannels. The proper physiological functioning of *Innexin* channels is  
99 dependent on their specific combinations (Stebbins et al., 2000). Functions of several of  
100 the *Innexin* classes have been characterized extensively during development and recently in  
101 behaviours exhibited by adult flies (reviewed in Güiza et al., 2018, summarized in Table.1).

102 Most of the studies which suggest a role of gap junctions in modulating circadian behaviour  
103 have been undertaken in mammals. Neurons in Suprachiasmatic nucleus (SCN); the  
104 circadian pacemaker in mammals are well-synchronized and form a coherent oscillator  
105 network (Herzog et al., 2017). Even though various mechanisms for intercellular coupling of  
106 SCN neurons have been suggested, including GABA and Vasoactive Intestinal peptide (VIP)  
107 (reviewed in Evans & Gorman, 2016), circadian clocks in the developing SCN are fully  
108 functional and apparently synchronized long before neurochemical synaptic connections are  
109 present (Moore & Bernstein, 1989, Landgraf et al., 2014), suggesting the existence of an  
110 additional mechanism for cell communication within the SCN like gap junctions. The SCN  
111 expresses a number of different *Connexins* (Welsh & Reppert, 1996, Colwell, 2000, Rash et  
112 al., 2007). Gap junction coupling in intact SCN tissue has been demonstrated with tracer  
113 molecules and by electrical stimulation and recording of neighbouring cells,(Jiang et al.,  
114 1997, Colwell, 2000, Shinohara et al., 2000) Gap junctions are involved in synchronous firing  
115 of coupled cells in SCN neuronal network which can be suppressed with Carbenoxolone, a  
116 reversible blocker of gap junctions (Wang et al., 2014). In particular, *Connexin36* (*Cx36*) has  
117 been reported to play a crucial role in electrical coupling of SCN neurons. Knockout of *Cx36*  
118 blocks intercellular electrical coupling between SCN neurons, and adult *Cx36* knockout mice  
119 display a lower amplitude of circadian locomotor activity rhythms and a decrease in overall  
120 activity levels under constant environmental conditions (Long et al., 2005). Another recent  
121 study, however shows that absence of *Cx36* does not affect the synchronous PER protein  
122 oscillations in SCN neuronal network even though the *Cx36* knockout mice have lengthened  
123 period of wheel-running activity as compared to controls (Diemer et al., 2017). Thus, even  
124 though some evidences suggest the importance of electrical coupling among SCN neurons  
125 for synchronous firing as well as for output behaviour, the underlying mechanisms are

126 poorly understood. To the best of our knowledge, in invertebrates, there has been only one  
127 study in the cockroach species, *Leucophaea maderae*, where, use of gap junction blockers  
128 results in desynchronized firing of accessory medulla neurons which are the circadian  
129 pacemaker centre (Schneider & Stengl, 2006). However, despite nearly three decades of  
130 studies of the *D. melanogaster* circadian pacemaker circuit, there has been no report of  
131 involvement of gap junctions in modulating circadian rhythms.

132 We performed a screen to identify the role played by gap junction proteins in the *Drosophila*  
133 circadian circuit. We found that the levels of two gap junction genes *Innexin1* and *Innexin2*  
134 determine a very core clock property, the free-running period. Here we have report results  
135 which demonstrate that INNEXIN2 is expressed in circadian pacemaker neurons and its  
136 knockdown causes activity rhythm to slow down. We report that oscillation of the core  
137 molecular clock protein (PERIOD) is lengthened in most circadian neurons upon *Innexin2*  
138 knockdown along with a change in the levels of neuropeptide PDF in the s-LNv dorsal  
139 projections. Thus, we provide the first evidence of a role for gap junction proteins in circadian  
140 pacemaker circuit of *Drosophila melanogaster* and suggest possible mechanisms for the  
141 same.

## 142 **Materials and Methods**

### 143 **Fly lines:**

144 All genotypes were reared on standard cornmeal medium under LD (12 hr Light: 12 hr Dark)  
145 cycles and 25 °C. The following fly lines were used in this study; *w<sup>1118</sup>* (BL 5905), UAS *Innexin1*  
146 RNAi (BL 44048), UAS *Innexin2* RNAi (BL 42645), UAS *Innexin3* RNAi (BL 60112), UAS *Innexin4*  
147 RNAi (BL 27674), UAS *Innexin5* RNAi (BL 28042), UAS *Innexin6* RNAi (BL 44663), UAS *Innexin7*  
148 RNAi (BL 26297), UAS *Innexin8* RNAi (BL 57706), UAS *GFP-NLS* (BL 4776), *tub GAL80<sup>ts</sup>* (BL 7017),

149 *Clk4.1M GAL4* (BL 36316), *Clk4.5F GAL4* (BL 37526), *repo GAL4* (BL 7415) (Bloomington  
150 *Drosophila* Stock Centre, Indiana). *Pdf GAL4* and *tim (A3) GAL4* (obtained from Todd Holmes,  
151 UC Irvine), *Clk856 GAL4* (provided by Orié Shafer, ASRC, CUNY), *pdf GAL80* (obtained from  
152 Helfrich-Forster, University of Wurzburg), *dvpdf GAL4* (obtained from Michael Rosbash,  
153 Brandeis University).

#### 154 **Locomotor activity rhythm assay:**

155 Individual virgin male flies (4-6 days old) were housed in glass tubes (length 65mm, diameter  
156 7mm) with corn food on one end and cotton plug on the other end. Locomotor activity was  
157 recorded using the *Drosophila* Activity Monitors (DAM, Trikinetics, Waltham, United States of  
158 America). Experiments were conducted in incubators manufactured by Sanyo (Japan) or  
159 Percival (USA).

#### 160 **Activity data analysis**

161 Raw data obtained from the DAM system were scanned and binned into activity counts of  
162 15 minute intervals. Data was analysed using the CLOCKLAB software (Actimetrics,  
163 Wilmette, IL) or RhythmicAlly (Abhilash & Sheeba, 2019). Values of period and power of  
164 rhythm were calculated for a period of 7-10 days using the Chi-square periodogram with a  
165 cut-off of  $p=0.05$ . The period and power values of all the flies for a particular experimental  
166 genotype were compared against the parental controls using one-way ANOVA with  
167 genotype as the fixed factor followed by post-hoc analysis using Tukey's Honest Significant  
168 Difference (HSD) test.

#### 169 **Immunohistochemistry**

170 Adult *Drosophila* brains were dissected in ice-cold Phosphate buffered saline (PBS) and fixed  
171 immediately after dissection in 4% Paraformaldehyde (PFA) for 30 min. The fixed brains  
172 were then treated with blocking solution (10% horse serum) for 1-h at room temperature  
173 and additional 6-h at 4 °C (Additional incubation is only given in case of staining with anti-  
174 PER antibody to reduce staining of non-specific background elements), followed by  
175 incubation with primary antibodies at 4 °C for 24-48 h. The primary antibodies used were  
176 anti-PER (rabbit, 1:20,000, kind gift from Jeffrey Hall, Brandeis University), anti-PDF (mouse,  
177 1:5000, C7, DSHB), anti-GFP (chicken, 1:2000, Invitrogen), anti-INNEXIN2 (guinea pig, 1:50,  
178 kind gift from Michael Hoch, University of Bonn). After incubation, the brains were given 6-  
179 7 washes with 0.5% PBS + Triton-X (PBT) after which they were incubated with Alexa-fluor  
180 conjugated secondary antibodies for 24-h at 4 °C. The following secondary antibodies were  
181 used, goat anti-rabbit 488 (1:3000, Invitrogen), goat anti-mouse 546 (1:3000, Invitrogen),  
182 goat anti-mouse 647 (1:3000, Invitrogen), goat anti-guinea pig 546 (1:3000, Invitrogen). The  
183 brains were further washed 6-7 times with 0.5% PBT and cleaned and mounted on a clean,  
184 glass slide in mounting media (7:3 glycerol: PBS). Exact same procedure was followed for  
185 experiments where immunostaining of larval brains (L3 stage) was required.

## 186 **Image acquisition and analysis**

187 The slides prepared for immunohistochemistry were imaged using confocal microscopy in a  
188 Zeiss LSM880 microscope with 20X, 40X (oil-immersion) or 63X (oil-immersion) objectives.  
189 Image analysis was performed using Fiji software (Schindelin et al., 2012). In the samples,  
190 clock neurons were classified based on their anatomical locations. PER intensity in these  
191 neurons were measured by selecting the slice of the Z-stack which shows maximum  
192 intensity, drawing a Region of Interest (ROI) around the cells and measuring their intensities.



193 3-6 separate background values were also measured around each cell and the final intensity  
194 was taken as the difference between the cell intensity and the background. Similar  
195 procedure was followed for measuring the intensity of PDF in s-LNV dorsal projections. The  
196 intensity values obtained from both the hemispheres for each cell type for each brain was  
197 averaged and used for statistical analysis. We used a COSINOR based curve-fitting method  
198 (Cornelissen, 2014) to estimate different aspects of rhythmicity like presence of a 24-h  
199 periodicity and phase and amplitude values of the oscillation. COSINOR analysis was  
200 implemented using the CATCosinor function from the CATkit package written for R (Lee  
201 Gierke & Cornelissen, 2016).

## 202 **Results and Discussion**

### 203 **RNAi knockdown screen of *Innexins* in clock neurons**

204 To examine the role of *Innexins* in the fly circadian network, we performed a RNAi  
205 knockdown screen where we knocked down the expression of each of the eight classes of  
206 *Innexin* genes using a broad *GAL4* driver that targets all the 150 clock neurons and examined  
207 rhythm properties under constant darkness (DD 25°C) (Table 2). In each case, knockdown of  
208 *Innexin1* (BL 44048) or *Innexin2* (BL 42645) with *timA3 GAL4*, we observed a significant  
209 lengthening of free-running period as compared to its parental controls (Fig. 1A, top; Fig. 1B,  
210 left) suggesting that *Innexin1* and *Innexin2* play important roles in determining the period of  
211 free-running rhythm. We also quantified the power of the rhythm, which is indicative of the  
212 robustness of the underlying clock, (reviewed in Klarsfeld et al., 2003). We found a  
213 significant decrease in the power of the rhythm in case of knockdown of *Innexin7* in clock  
214 neurons in one trial (Fig. 1A, bottom). However, this result was not consistent across  
215 multiple replicate experiments, and hence it was not pursued further. Importantly, we

216 found no difference in the power of the rhythm in case of *Innexin1* and *Innexin2* knockdown  
217 although there was a significant lengthening of period (Fig. 1A, bottom; Fig. 1B, right)  
218 suggestive of the fact that the robustness of the clock was not affected. In this report, we  
219 describe our studies on the role of *Innexin2* in the circadian clock network. (Studies on the  
220 role of *Innexin1* in the circadian network are ongoing and will be described in detail  
221 elsewhere, Ramakrishnan and Sheeba, *manuscript in preparation*).

222 Additionally, we also knocked down *Innexin2* expression in all clock neurons using another  
223 driver, *Clk856 GAL4* which has a narrower expression pattern as compared to *tim GAL4*, but  
224 nevertheless targets most clock neurons except few DN3 (Gummadova et al., 2009).  
225 *Innexin2* knockdown using *Clk856 GAL4* also resulted in lengthening of free-running period  
226 by about an hour as compared to their respective parental controls (Fig. 1C, left). No  
227 significant difference in the power of the rhythm was observed in case of *Innexin2*  
228 knockdown as observed with the *tim GAL4* driver (Fig. 1C, right). We have also down-  
229 regulated the expression of *Innexin2* in the clock neurons using an alternate construct (BL  
230 80409) on a different chromosome to account for the non-specific positional effects  
231 because of insertion of transgene. We observed similar extent of period lengthening with a  
232 different construct suggesting that the period lengthening phenotype seen is an effect of  
233 *Innexin2* knockdown and not because of positional effects (Supplementary fig. S1).

234 ***Innexin2* in ventral lateral neurons is important in determining the period of**  
235 **free-running rhythms.**

236 To determine whether *Innexin2* levels in specific subsets of the clock network modulates the  
237 free-running period, we used different drivers that target distinct subsets of circadian  
238 neurons; the ventral lateral neurons (*pdf GAL4*), ventral and dorsal lateral neurons (*dvpdf*

239 *GAL4*), dorsal neurons (*Clk4.1M* and *Clk 4.5F GAL4*) as well as the glial cells (*repo GAL4*), the  
240 results of which are represented in the form of a table (Table 3). We found that *Innexin2*  
241 knockdown in lateral neurons with *dvpdf GAL4* and specifically the ventral lateral neurons  
242 using *pdf GAL4* resulted in lengthening of free-running period of the experimental flies as  
243 compared to controls (Fig. 2A, left), thus suggesting that *Innexin2* in these neurons are  
244 important in determining the period of the rhythm. As seen with the previous experiment,  
245 there was no difference in the power of the rhythm between the experimental and control  
246 flies (Fig. 2A, right). It is important to note here though that the period lengthening seen in  
247 case of experimental genotype when *Innexin2* was knocked down with *pdf GAL4* (about 20  
248 min) was not as long as that obtained using *tim GAL4* (about 60 min). This could be because  
249 of differences in the strength of *GAL4* drivers used or due to *Innexin2* being functional in  
250 greater number of cells than the ones targeted by *pdf GAL4*. To examine the functional  
251 contribution of *Innexin2* in the ventral lateral neurons, we used *pdf GAL80* along with *tim*  
252 *GAL4* such that *Innexin2* expression is now down-regulated in all circadian neurons except  
253 the ventral lateral neurons. The efficiency of the *pdf GAL80* construct in suppressing *GAL4*  
254 expression in ventral lateral neurons was verified via immunohistochemistry using a GFP  
255 marker (Supplementary fig. S2).

256 *tim; pdf GAL80 > Inx2 RNAi flies* do not show a significantly lengthened period as compared  
257 to controls (Fig. 2B, left) and there was no change in power of the rhythm (Fig. 2B, right),  
258 suggesting that *Innexin2 function* in the ventral lateral subset contributes to free running  
259 period of activity rhythm.

## 260 **Distribution of INNEXIN2 in the circadian pacemaker circuit**

261 Previous studies which have focused on the roles of *Innexin2* during nervous system  
262 development have found that during the larval stages, *Innexin2* is expressed to a large  
263 extent in the neural precursor cells and glial cells (Holcroft et al., 2013). To investigate the  
264 distribution of INNEXIN2 protein in the adult *Drosophila* brain and clock neuronal circuit, we  
265 performed immunohistochemistry using anti-INNEXIN2 antibody (Bohrmann &  
266 Zimmermann, 2008, kind gift from Prof. Michael Hoch, University of Bonn). To examine the  
267 co-localization of INNEXIN2 with the clock neurons, we used flies expressing nuclear  
268 localized GFP (GFP-NLS) with *tim GAL4* and co-stained the brain samples with antibody  
269 against INX2. In accordance with our behavioural results, we find that among clock neurons,  
270 INNEXIN2 is expressed only in the ventral lateral neuronal subset i.e. the small and large  
271 ventral neurons (Fig. 3). Additionally, we also consistently observe INNEXIN2 expression in  
272 about 8-9 cells in the dorsal side of the brain which are in close proximity to the dorsal DN1  
273 neurons but do not co-localize with any of the dorsal clock neurons (Fig. 3, right, top and  
274 bottom). Thus, results from our behavioural and immunohistochemistry experiments put  
275 together suggest that INNEXIN2 is present and has functional roles in the ventral lateral  
276 neuronal subsets in determining the period of free-running rhythms.

### 277 **Lengthening of free-running period due to *Innexin2* knockdown suggests its** 278 **roles in mature adult circadian circuit**

279 Since several previous studies have shown that *Innexin2* plays crucial roles during  
280 development of the fly of the nervous system, (Bauer et al., 2002, Bauer et al., 2004,  
281 Holcroft et al., 2013) we asked if the period lengthening seen in our experiments is due to  
282 defects in the development of the circadian pacemaker neuronal circuit or due to roles  
283 played by *Innexin2* in the mature, adult circuit. To distinguish between the two

284 mechanisms, we temporally restricted the knockdown of *Innexin2* to the adult stages using  
285 the TARGET system (McGuire et al., 2004). All the flies used in this experiment were reared  
286 at a permissive temperature of 19 °C from embryonic stages till 3 days after eclosion to  
287 allow for the repression of *GAL4* by *tub GAL80<sup>ts</sup>* and facilitate proper development including  
288 the final pruning of synaptic connections in the nervous system. The flies were then  
289 transferred to LD 12:12 at 29 °C and then assayed under constant darkness and restrictive  
290 temperature of 29 °C. The efficiency of the system in repressing the *GAL4* during  
291 development was verified by expressing UAS-*eGFP* under the same driver, *tim GAL4*; *tub*  
292 *GAL80<sup>ts</sup>* and assessing GFP expression by immunohistochemistry in the larval stage L3  
293 (Supplementary fig. S3). Significant lengthening of period of activity rhythm was observed  
294 in experimental flies as compared to controls even when *Innexin2* knockdown in clock  
295 neurons was restricted to adult stages (Fig. 4A, left), suggesting that *Innexin2* plays a role in  
296 the adult circadian circuit to determine the period of free-running rhythms. However, we  
297 acknowledge the fact that in the larval stages, we see faint GFP staining in 1 out of 3-4 s-  
298 LNvs/hemisphere in some of the brain samples, thus suggesting that the *tub GAL80<sup>ts</sup>* was  
299 unable to completely repress the expression of *Innexin2* RNAi during development. But to a  
300 large extent, we can conclude that the period lengthening that we observe are largely due  
301 to its roles in the adult circuit although *Innexin2* could possibly have some roles in the  
302 development of the circuit. In this specific case, the power of rhythm of the experimental  
303 flies was found to be significantly higher than the controls (Fig. 4A, right). We also restricted  
304 the knockdown to the ventral lateral neurons in the adult stages only using *pdf GAL4* and  
305 *tub GAL80<sup>ts</sup>*. In this case, however, we observed a significant lengthening of period from  
306 only one parental control (Fig. 4B, left), although we see a trend towards longer period  
307 values. This could be because *Innexin2* levels modify development of these cells such that

308 the period lengthening seen during constitutive knockdown is an additive effect of its roles  
309 during development and in the mature circuit. In this case too, we found that the power of  
310 the rhythm is significantly higher than controls (Fig. 4B, right).

311 **Knockdown of *Innexin2* delays the phase of PERIOD protein oscillation in the**  
312 **circadian clock network and leads to higher levels of PDF accumulation in s-**  
313 **LNv dorsal terminals**

314 In order to examine the mechanism by which *Innexin2* influences the period of free-running  
315 rhythms in *Drosophila*, we tracked the oscillation of the core molecular clock protein,  
316 PERIOD (PER) in the 6 circadian pacemaker cell clusters and also the levels of the clock  
317 output neuropeptide PDF in the dorsal projections over a 24-h cycle on day 3 of constant  
318 darkness (DD) in both control (*dcr; Inx2* RNAi; UAS control) and experimental (*Clk856 > dcr;*  
319 *Inx2* RNAi) flies. We found that even though *Innexin2* is present only in the ventral lateral  
320 neurons, the oscillation of PERIOD protein is phase-delayed in most clock neurons in the  
321 circuit. Using a COSINOR-based curve-fitting method, we found a significant 24-h rhythm in  
322 PER oscillation in s-LNv in case of both control and experimental flies (Fig. 5, Table 4). The  
323 phase of PER oscillation in case of experimental flies was however significantly delayed from  
324 control flies (Fig. 6A) suggesting that *Innexin2* knockdown results in a shift in the core  
325 molecular clock oscillation. The amplitude of oscillation was not found to be different from  
326 controls (Fig. 6B). In case of PER oscillation in l-LNv, we could detect a significant 24-h  
327 rhythm in case of both control and experimental flies (Fig. 5, Table 4). The phase of the  
328 oscillation was also significantly delayed in case of experimental flies as compared to  
329 controls (Fig. 6A). Even though the amplitude of oscillation in the l-LNv in experimental flies  
330 was not found to be different from the controls (Fig. 6B), the amplitude of oscillation in l-  
331 LNv in control flies was found to be significantly lower than that of s-LNv (Supplementary fig.

332 S4). In case of 5<sup>th</sup> s-LNV, we observe a significant 24-h oscillation in the control flies. But in  
333 case of experimental flies, no significant rhythmicity was detected using the COSINOR-based  
334 method (Fig. 5, Table 4). In case of LNd, both the control and experimental flies show a  
335 significant 24-h rhythm in PER oscillation (Fig. 5, Table 4). The phase of oscillation of  
336 experimental flies was found to be significantly delayed from the controls (Fig. 6A). The  
337 amplitude of oscillation in LNd was not found to be different between the control and  
338 experimental flies (Fig. 6B), whereas the amplitude of oscillation of control flies was found  
339 to be significantly lower as compared to s-LNV (Supplementary fig. S4)

340 In case of DN1, although we could detect a significant 24-h periodicity in control flies, the  
341 amplitude of the oscillation was highly dampened. (Fig. 5, Table 4) In experimental flies,  
342 however, DN1s do not show significant rhythmicity in PER oscillation and had overall low  
343 amplitude (Fig. 5, Table 4). In case of DN2s, both control and experimental flies do not show  
344 a significant 24-h rhythmicity and have highly dampened oscillation (Fig. 5, Table 4). Since  
345 PDF is an important neuropeptide in the circadian pacemaker circuit which plays a role in  
346 the synchronization of all the neurons and PDF levels in dorsal projections cycle with a 24-h  
347 periodicity under DD, we examined whether *Innexin2* knockdown has an effect on the PDF  
348 levels or oscillations in the s-LNV dorsal terminal. We found that, both control and  
349 experimental flies show a robust 24-h oscillation in PDF levels in the dorsal projections (Fig.  
350 7A). In contrast to PER oscillation, there was no significant difference in the phase of PDF  
351 oscillation in experimental flies as compared to the control (Fig. 7B, left, Table 4). However,  
352 we observed that PDF levels and amplitude was significantly higher in experimental flies as  
353 compared to the control (Fig. 7B, right, Table 4).

## 354 Discussion

355 The neuronal and molecular mechanisms underlying circadian rhythms have been  
356 extensively studied in *Drosophila melanogaster* for many years now. Yet, an interesting  
357 question that remains to be answered is how are free-running behavioural rhythms with a  
358 near 24-h periodicity generated by the network. Although membrane excitability states  
359 have been shown to be important for circadian behaviour in *Drosophila* and there are some  
360 reports from mammalian studies on the role played by gap junctions in SCN neural network,  
361 there have been no systematic studies investigating the importance of electrical synapses in  
362 the circadian pacemaker circuit in *Drosophila*. We report here for the first time that gap  
363 junction proteins play important roles in the *Drosophila* circadian pacemaker circuit to  
364 influence the period of free-running rhythms.

365 Our screen revealed that gap junction genes *Innexin1* and *Innexin2* may play important roles  
366 in determining the period of free-running rhythms. We carried out further experiments to  
367 understand the mechanism by which *Innexin2* modulates the free-running period. We  
368 found that among the clock neurons *Innexin2* is present and functions solely in the small  
369 and large ventral neuronal subsets. Several previous studies have shown the importance of  
370 s-LNv and PDF under constant darkness to generate free-running rhythms of near 24-h  
371 periodicity (Renn et al., 1999, Grima et al., 2004, Stoleru et al., 2004, Park et al., 2000, Yoshii  
372 et al., 2009), although, some studies challenge the notion of the hierarchical role played by  
373 s-LNv in the network and instead show it to be composed of multiple coupled oscillators  
374 with each of them contributing to the resultant free-running period in behaviour (Sheeba et  
375 al., 2008, reviewed in Sheeba, Kaneko, et al., 2008, Yao & Shafer, 2014, Dissel et al., 2014,  
376 Schlichting et al., 2019, Delventhal et al., 2019). In either case, it is well-accepted now that  
377 s-LNv play significant role in determining the period of the network. Since, *Innexin2* is  
378 present in the s-LNv and influences the free-running period, we investigated the underlying



379 mechanism. As a first step towards the same, we examined the oscillation of molecular  
380 clock protein PERIOD on third day in DD in both control and experimental flies in which  
381 *Innexin2* was knocked down in all clock neurons. To our surprise, we found that the  
382 molecular clock is delayed in most clock neurons even though *Innexin2* was only found to be  
383 present in the LNvs. Phase of PER oscillations in case of s-LNv, l-LNv and LNd cell types in  
384 experimental flies were found to be significantly delayed as compared to control flies.  
385 Although, amplitude of oscillations were not different between the experimental and  
386 control flies in each of these cell types, amplitude of oscillations in l-LNv and LNd in control  
387 flies were significantly lower than the s-LNv. It has been observed in several previous  
388 studies that amplitude of PER oscillation in l-LNv dampen after 2 days in constant darkness  
389 (Yang & Sehgal, 2001, Shafer et al., 2002, Peng et al., 2003, Roberts et al., 2015) and we  
390 observe something similar in our experiment. In case of LNd, a previous study has shown  
391 them to be a heterogenous group of cells which are differentially coupled to sLNv with some  
392 having stronger and others having weaker coupling (Yao & Shafer, 2014). However, in this  
393 experiment, we had no means to distinguish amongst them and have averaged PER  
394 intensities across all the 5-6 cells which could also contribute to the observed low amplitude  
395 values. 5<sup>th</sup> s-LNv shows rhythmic PER oscillations in control flies whereas the experimental  
396 flies show arrhythmicity. This lack of rhythmicity in 5<sup>th</sup> s-LNvs in experimental flies could be  
397 explained in the context of a previous study which shows that 5<sup>th</sup> s-LNv being only weakly  
398 coupled to PDF<sup>+</sup> s-LNv and also receives input from PDFR<sup>-</sup> LNd (Yao & Shafer, 2014), and the  
399 arrhythmicity observed could be because of conflicting signals received from the two cell  
400 clusters of different periodicities. Similarly, in case of DN1, we observe highly dampened  
401 rhythms in control flies, similar to previous studies which have reported less robust  
402 rhythms, with patterns of dampening amplitude and loss of coherent rhythmicity in DN1

403 over 6 days in DD (Roberts et al., 2015, Yoshii et al., 2009). Lack of rhythmicity in DN1 in  
404 case of experimental flies could be could be explained by the fact that these cells receive  
405 conflicting signals from sLNv and LNd with different periodicities (Zhang et al., 2010). In  
406 case of DN2, both the control and experimental flies do not show a significant 24-h  
407 rhythmicity and have highly dampened rhythms. Although PDFR is expressed in DN2,  
408 molecular clock in DN2 was found to be independent of the control of sLNv and do not seem  
409 to have profound effects on rhythmic activity-rest behaviour in DD (Stoleru et al., 2005).

410 How does a gap junction protein localized to the membrane of LNv affect the phase of  
411 molecular clock protein oscillations in the network? It is possible that INNEXIN2 present in  
412 the membrane of LNv affects the membrane excitability state of these neurons which then  
413 affects the core molecular clock. Several previous studies have shown that membrane  
414 excitability states of the LNv can affect both the core molecular clock and features of  
415 activity-rest rhythms. Both small and large LNvs show time-of-day dependence in  
416 membrane electrical activity such that it is depolarized in the early part of the day and  
417 becomes hyperpolarized in the later part of day (Sheeba, Gu, et al., 2008, Cao & Nitabach,  
418 2008). Constitutive hyperexcitation of LNv membrane by expression of sodium channel  
419 NaChBac results in complex rhythms with multiple periodicities in behaviour along with  
420 desynchronization of molecular clocks in the circuit and disrupted cycling of PDF in dorsal  
421 terminals (Nitabach et al., 2006). Silencing of LNv by expressing the inward potassium  
422 rectifier channel Kir2.1 results in behavioural arrhythmicity, and disruption of molecular  
423 clocks (Nitabach et al., 2002), although adult-specific silencing of these neurons have milder  
424 effects (Depetris-Chauvin et al., 2011). Membrane excitability states can also affect the  
425 transcriptional states of LNv such that hyperexcitation can generate a very different gene  
426 expression profile in the cell as compared to hyperpolarization (Mizrak et al., 2012). Thus, it

427 is evident that membrane excitability states can affect the core molecular clock and the  
428 delay in PER oscillations observed in case of *Innexin2* knockdown could be via changes in  
429 membrane excitability states of the LNV. This is in contrast to what has been reported about  
430 the mechanism by which gap junction gene *Cx36* functions in the SCN which states that  
431 although *Cx36* affects the synchrony of firing of SCN cells and period and amplitude of  
432 behavioural rhythms, it does not affect the period, amplitude or synchrony of molecular  
433 clocks in SCN slices (Long et al., 2005, Wang et al., 2014, Diemer et al., 2017).

434 The mechanism of action of gap junctions have been well-studied in case of *Connexins* and  
435 not so much in case of *Innexins*, although the basic structure and function of the two are  
436 comparable (Beyer & Berthoud, 2018). Gap junctions in nervous systems are known to  
437 facilitate generation and modulation of synchronous firing of neurons which can also affect  
438 the release of neuropeptide and neurotransmitters. Other than being involved in electrical  
439 coupling, gap junctions also facilitate passage of secondary messengers and small molecules  
440 whose size is less than 1 kDa between neuron-neuron or they can act as hemichannels and  
441 facilitate transport between neurons and extra cellular matrix (reviewed in Nielsen et al.,  
442 2012).

443 We propose two possible hypotheses for the mechanism by which *Innexin2* in LNV  
444 membrane could affect the molecular clock oscillations in circadian neurons. The first  
445 possibility is that *Innexin2* could be involved in electrical coupling and synchronous neuronal  
446 firing among the LNV and the absence of *Innexin2* results in desynchronized firing which  
447 could be reflected in the release of PDF. In our experiments, we observe that the amplitude  
448 of PDF oscillation and level of PDF in the dorsal projections is much higher in experimental  
449 flies than in control ones. Several studies have shown that PDF acts to lengthen the period

450 of the circadian network and that overexpression or ectopic expression of PDF in the dorsal  
451 protocerebrum lengthens the period of activity rhythms, leads to desynchronization of  
452 activity-rest behaviour and molecular clocks in the circadian neurons (Charlotte Helfrich-  
453 Förster et al., 2000, Wülbeck et al., 2008, reviewed in Shafer & Yao, 2014). Thus, *Innexin2*  
454 may play a role in synchronized firing and release of PDF in the dorsal projections, the  
455 absence of which could result in PDF being present in the projections at a higher level and  
456 could delay the molecular clocks in all the other clock neurons. The alternate possibility  
457 could be that *Innexin2* is necessary to maintain a certain absolute value of membrane  
458 potential of the LNV at certain times of the day or are important to regulate the number,  
459 frequency or pattern of action potential firing in these cells and a disruption in this process  
460 in case of *Innexin2* knockdown translates into a delay in the molecular clocks in LNVs which  
461 is then transmitted to other neurons in the circuit via PDF. Indeed, there is some evidence  
462 to suggest that gap junctions affect the frequency of firing of action potentials in the I-LNV  
463 membrane. An experiment performed by Cao and Nitabach using gap junction blocker  
464 Carbenoxolone in the bath and recording action potentials from the I-LNV shows that  
465 blocking electrical synapses reduces the frequency of firing of action potentials in these cells  
466 (Cao & Nitabach, 2008). At this time we do not know how these changes in firing frequency  
467 may alter the core molecular clock in circadian pacemakers, however studies performed on  
468 neurons from the dorsal root ganglion suggest that expression levels of many genes are  
469 highly affected by firing frequency (Fields et al., 1997, Lee et al., 2017).

470 While current experiments do not allow us to distinguish between the above mentioned  
471 possibilities, further experiments need to be done to address the following questions. Do  
472 *Innexin2* mutant flies exhibit time-of-day dependent oscillations in membrane potential in  
473 the LNV? Does knockdown of *Innexin2* affect the absolute membrane potential value of LNV

474 as compared to controls or does it affect the synchronous firing of those neurons? These  
475 questions can be addressed by electrophysiological recording of the LNV although recording  
476 from the s-LNV is technically challenging. An alternate approach would be to measure the  
477 spontaneous calcium activity rhythms in these cells and all the other cells of the circuit in a  
478 time-of-day dependent manner which can reveal any changes in membrane electrical state  
479 in the circadian pacemaker neurons (Liang et al., 2016).

480 Additionally, we also find that *Innexin2* plays predominant roles in the mature, adult  
481 circadian circuit to influence the period of free-running rhythms although our results also  
482 suggest that it could have some roles to play in the development of clock neuronal circuit.  
483 Also, in case of adult specific knockdown of *Innexin2* in all clock neurons as well as ventral  
484 lateral neurons, we observe that power of rhythm in experimental flies was much higher  
485 than that of controls which we do not observe in case of constitutive knockdown of *Innexin2*  
486 during both developmental and adult stages. One probable explanation could be that the  
487 circuits are wired differently in the presence and absence of *Innexins* such that instead of  
488 multiple oscillators with different periods contributing to the behaviour, the relative  
489 contribution of some oscillators have increased or decreased. However, further  
490 experiments are needed to validate the same.

491 How does *Innexin2* form gap junctions in the LNV? Previous studies have reported that  
492 *Innexin2* can form functional heterotypic gap junctions with *Innexin1*, *Innexin3* or *Innexin4*  
493 as well as form homotypic gap junctions with itself to facilitate passage of ions and/or  
494 secondary messengers or small molecules (Bauer et al., 2003, Bohrmann & Zimmermann,  
495 2008, Holcroft et al., 2013). Alternatively, *Innexin2* can also function as hemichannels and  
496 facilitate coupling between the cell and extracellular matrix, thus allowing passage of ions or

497 small molecules. Since, we do not observe any period lengthening in case of *Innexin3* or  
498 *Innexin4* knockdown, the only possibilities are *Innexin2* forming functional heterotypic gap  
499 junction with *Innexin1* or homotypic gap junctions with itself. With results from this  
500 manuscript and our results from another study (Ramakrishnan and Sheeba, *manuscript in*  
501 *preparation*) put together, we can conclude that *Innexin2* either forms homotypic gap  
502 junctions or functions as hemichannels in s-LNV, and in case of l-LNV, *Innexin2* and *Innexin1*  
503 probably form heterotypic gap junctions. However, this needs further validation. Recently,  
504 a technique was developed by Wu et al to demonstrate functional electrical coupling among  
505 cells called PARIS (Pairing Actuators and Receivers to Optically Isolate Gap junctions) (L. Wu  
506 et al., 2019). Studies to determine functional electrical coupling among the LNVs using this  
507 technique both in control flies as well as *Innexin1* and *Innexin2* mutants to identify the type  
508 (homotypic or heterotypic) of channels present in these cells would be valuable  
509 Thus, our findings highlighting a hitherto unknown role for *Innexins* in the adult circadian  
510 pacemaker circuit of *D.melanogaster* in determining free-running period of activity rhythms  
511 via influencing a core clock protein PER within s-LNV and l-LNV reveals the action of a  
512 combination of electrical and chemical synapses in circadian pace-making.

### 513 **Figure legends**

#### 514 **Figure 1: RNA interference screen of *Innexins* in the clock neurons under DD 25 °C. (A)**

515 Mean free-running period (top) of flies with individual *Innexin* (*Innexin 1-8*) genes knocked  
516 down are being plotted along with their common *GAL4* control (*tim GAL4/+*) and respective  
517 UAS controls (UAS *Innexin* RNAi). Power of rhythm in case of individual knockdown of all  
518 the eight classes of *Innexins* along with their relevant parental controls are being plotted  
519 (bottom) ( $n > 26$  flies for each genotype). (B) Mean free-running period (left) of

520 experimental flies with *Inx2* knockdown using *tim GAL4* driver (*tim; dcr > Inx2* RNAi) is  
521 significantly longer than both driver control (*GAL4* control) and UAS control (left) while the  
522 power of the Chi- Square periodogram (right) of the experimental flies is not significantly  
523 different from the parental controls. 4 independent experiments were performed with  
524 similar results, with  $n > 22$  flies for each genotype in each experiment. The graphs represent  
525 the results obtained from one representative experiment. **(C)** Mean free-running period  
526 (left) of experimental flies with *Inx2* knockdown using *Clk856* driver that targets most of the  
527 clock neurons (*Clk856 > dcr; Inx2* RNAi) is significantly longer than parental controls and the  
528 power of rhythm (right) is not different from controls. 3 independent experiments were  
529 performed with similar results, with  $n > 25$  flies for each genotype in each experiment. The  
530 graphs represent the results obtained from one representative experiment.

531 Asterisks indicate significant difference between the experimental genotype and controls  
532 obtained using one- way ANOVA followed by Tukey's HSD at  $p < 0.001$ , error bars are SEM,  
533 period and power values are determined using Chi-square periodogram for a period of 7  
534 days.

535 **Figure 2: *Innexin2* knockdown in ventral lateral neurons lengthens free-running period.**

536 **(A)** Mean free-running period (left) of flies with *Innexin2* downregulated in the ventral  
537 lateral neurons (*pdf; dcr > Inx2* RNAi) is significantly longer than both its parental controls  
538 while the power of rhythm (right) is not different. 4 independent experiments were  
539 performed with similar results, with  $n > 28$  flies for each genotype in each experiment. **(B)**  
540 Mean free-running period (left) of flies with *Innexin2* knockdown in all neurons of the clock  
541 circuit except the ventral lateral neurons (*tim; pdf GAL80 > dcr; Inx2* RNAi) do not show a  
542 significant period lengthening as compared to its respective controls and the power of the

543 rhythm (right) is not different between experimental flies and controls. 3 independent  
544 experiments were performed with similar results, with  $n > 25$  flies for each genotype in each  
545 experiment. The graphs represent the results obtained from one representative  
546 experiment. Asterisks indicate significant difference between the experimental and control  
547 flies obtained using one-way ANOVA followed by Tukey's HSD at  $p < 0.01$  (for fig. 2A), error  
548 bars are SEM, period values are determined using Chi-square periodogram for a period of 7  
549 days.

550 **Figure 3: INNEXIN2 is localized to the small and large ventral lateral neurons in the**  
551 **circadian pacemaker circuit.** Representative images from two different brains showing the  
552 distribution of INX2 protein among the clock cells. *tim > GFP-NLS* flies were stained with  
553 anti-GFP and anti-INX2 and checked for co-localization. INNEXIN2 was found to be  
554 predominantly localized to the membranes of small and large ventral lateral neurons (s-LNv  
555 and l-LNv) among the clock neurons (top and bottom, left and middle panels). INNEXIN2  
556 was also present in 8-9 cells in the dorsal side of the brain in close proximity to DN1 neurons  
557 (top and bottom right panels). Brightness and contrast of representative images were  
558 adjusted in Fiji to facilitate better visualization. Arrows are used to indicate s-LNvs and l-  
559 LNvs, scale-bar represents 21  $\mu\text{m}$ ,  $n = 9$  brain samples.

560 **Figure 4: Period lengthening seen in case of *Innexin2* knockdown is not due to**  
561 **developmental defects. (A)** Mean free-running period (left) of activity rhythm when  
562 *Innexin2* knockdown in all the clock neurons is restricted to adult stages (*tim; tub GAL80<sup>ts</sup> >*  
563 *dcr; Inx2 RNAi*), is significantly longer compared to its relevant parental controls. Power of  
564 rhythm (right) of the experimental flies are found to be significantly higher than controls ( $n$   
565  $> 21$ ). **(B)** Mean free-running period (left) of activity rhythm in case of adult-specific



566 knockdown of *Innexin2* only in the ventral lateral neurons (*pdf; tub GAL80<sup>ts</sup> > dcr; Inx2* RNAi)  
567 was only significantly different from its *GAL4* control. Power of the rhythm (right) was not  
568 different from controls ( $n > 15$ ). Asterisks indicate significant difference between the  
569 experimental flies and controls obtained using one-way ANOVA followed by Tukey's HSD at  
570  $p < 0.001$  (for panel A), and  $p < 0.05$  (for panel B), error bars are SEM, period and power values  
571 are determined using Chi-square periodogram for a period of 10 days in DD 29° C.

572 **Figure 5: Knockdown of *Innexin2* delays the oscillation of PER in most clock neuronal**  
573 **subsets in the circadian pacemaker circuit.** Scatter plots of PER staining intensities in each  
574 of bilaterally located six distinct neuronal clusters of the circadian pacemaker network of  
575 both the control (*dcr; Inx2* RNAi) and experimental (*Clk856 > dcr; Inx2* RNAi) flies plotted at  
576 different time-points over a 24-h cycle on third day of DD. Each dot represents the mean  
577 PER intensity value averaged over both the hemispheres of one brain. The gray and blue  
578 lines are the best fit COSINE curve from the parameters that were extracted from the  
579 COSINOR analysis.  $n > 11$  brain samples both in case of control and experimental flies for all  
580 time points except for CT10 in case of experimental flies where a technical difficulty resulted  
581 in  $n = 3$  brain samples only being imaged. In case of 5<sup>th</sup> s-LNv, we could not detect any cells  
582 at CT10 in experimental samples, hence that time point was not included for analysis.

583 **Figure 6: *Innexin2* knockdown affects the phase but not the amplitude of PER oscillations**  
584 **in the clock cells. (A)** Polar-plots depicting the acrophase of PER oscillation in control (*dcr;*  
585 *Inx2* RNAi) (gray lines) and experimental flies (*Clk856 > dcr; Inx2* RNAi) (blue lines) in all six  
586 distinct neuronal clusters of the circadian pacemaker network. The acrophase values  
587 obtained after COSINOR curve fitting are shown as solid lines and the error (95% CI values) is  
588 depicted as dashed lines around the mean for all the cell types. Non-overlapping error

589 values indicate that phase values of experimental flies are significantly different from  
590 controls as seen in the case of s-LNV, l-LNV, and LNd. Although the experimental lines in  
591 case of DN1 have non-overlapping phase value from controls, no significant 24-h rhythms  
592 were detected in this case. **(B)** Amplitude values obtained from COSINOR curve fits are  
593 plotted for control and experimental flies for those cell groups which show significant 24-h  
594 rhythms (s-LNV, l-LNV and LNd) and the error bars represent 95% CI values. Overlapping  
595 error bars indicate that amplitude values of experimental flies are not significantly different  
596 from controls. See Table 4 for more details.

597 **Figure 7: *Innexin2* knockdown affects the amplitude of PDF oscillations in the sLNV dorsal**  
598 **projections (A)** Scatter plots of PDF intensity in the s-LNV dorsal projection of both the  
599 control (*dcr; Inx2* RNAi) and experimental (*Clk856 > dcr; Inx2* RNAi) flies plotted at different  
600 time-points over a 24-h cycle on third day of DD. Each dot represents the mean PDF  
601 intensity value averaged over both the hemispheres of one brain.  $n > 10$  brain samples both  
602 in case of control and experimental flies for all timepoints except for CT10 in case of  
603 experimental lines where a technical difficulty resulted in  $n = 3$  brain samples only being  
604 imaged. The gray and blue lines are the best-fit COSINE curve from the parameters that  
605 were extracted from the COSINOR analysis. **(B)** Polar-plots depicting the acrophase of PDF  
606 oscillation in control (*dcr; Inx2* RNAi) and experimental flies (*Clk856 > dcr; Inx2* RNAi) (left).  
607 The mean phase values obtained after COSINOR curve fitting are shown as solid lines and  
608 the error values (95% CI) are depicted as dashed lines around the mean. Overlapping error  
609 bands indicate that the experimental phases are not significantly different from controls.  
610 Amplitude values obtained from COSINOR curve fits are plotted for control and  
611 experimental flies and the error bars represent 95% CI values (right). Non-overlapping error

612 bars indicate that experimental lines are significantly different from controls. See Table 4  
613 for more details.

614 **Table 1:** Summary of the different functional roles played by all eight *Innexin* genes in  
615 *Drosophila melanogaster* both during development and adult stages.

616 **Table 2:** Table representing the average period ( $\pm$ SEM), power of the periodogram ( $\pm$  SEM)  
617 and % rhythmicity values of all the experimental (*tim; dcr > Inx1-8 RNAi*) lines used for the  
618 screen and their respective parental controls (*w; tim GAL4; dcr*) and UAS control (UAS *Inx 1-*  
619 *8 RNAi*).

620 **Table 3:** Table representing the average period ( $\pm$ SEM), power of the periodogram ( $\pm$  SEM)  
621 and % rhythmicity values of flies in case of *Innexin2* knockdown in different subsets of clock  
622 neurons and glia.

623 **Table 4:** Table representing the parameters obtained after fitting a COSINE curve on the PER  
624 and PDF intensity data obtained over a 24-h period for all the circadian neuronal subsets on  
625 third day of constant darkness. The parameters obtained are p-values and percent rhythm  
626 (PR) to test for significant 24-h periodicity, and the amplitude and phase values along with  
627 their respective standard errors (SE).

628 **Supplementary fig. S1: Knockdown of Innexin2 in all clock neurons using an alternate**  
629 **construct (BL 80409) lengthens the period of free-running rhythms** Mean free-running  
630 period (left) of flies with *Innexin2* downregulated in all clock neurons (*Clk856 > dcr; Inx2*  
631 *RNAi*) is significantly longer than both its parental controls while the power of rhythm (right)  
632 is significantly lower than only one parental control.  $n > 15$  flies for each genotype.

633 **Supplementary fig. S2: Verification of the efficiency of *pdf GAL80* construct** The efficiency  
634 of *tim; pdf GAL80* construct was verified by crossing *tim GAL4; pdf GAL80* flyline with *GFP-*  
635 *NLS*, dissecting the brains at ZT22 and staining with GFP and PER. Both small and large LNvs  
636 did not show any GFP staining (left), whereas strong PER staining was observed in all clock  
637 neurons (middle). n=6 brain samples were imaged.

638 **Supplementary fig. S3: Verification of the efficiency of *tub GAL80<sup>ts</sup>* construct** The efficiency  
639 of *tim; tub GAL80<sup>ts</sup>* construct was verified by crossing *tim; tubGAL80<sup>ts</sup>* with *eGFP*. The flies  
640 were reared at a permissive temperature of 19 °C. Larvae (L3 stage) from the progeny was  
641 dissected and stained with GFP and PER antibodies. s-LNv do not show presence of GFP in  
642 permissive temperatures (left), whereas strong PER staining was observed in this cell  
643 (middle). n=5 brain samples were imaged.

644 **Supplementary fig. S4: Amplitude of PER oscillations are different in circadian neuronal**  
645 **neuronal subsets on third day of DD** Amplitude values of PER oscillation obtained from  
646 COSINOR curve fits are plotted for control (*UAS dcr; Inx2 RNAi*) flies for all the circadian  
647 neuronal subsets. The error bars represent 95% CI values. Non-overlapping error bars in  
648 case of l-LNv, LNd and DN1 compared to s-LNv indicate that these amplitude values are  
649 different from s-LNv.

## 650 **Acknowledgements**

651 We thank JNCASR Intramural funds and a grant from DST-SERB (CRG/2019/006802) for  
652 funding this work. We thank DST-INSPIRE for providing fellowship to AR. We thank Prof.  
653 Michael Hoch, Dr. Reinhard Bauer and Prof. Jeffrey Hall for generously sharing anti-INX2  
654 (guinea pig) and anti-PER (rabbit) antibody respectively, and Ori Shafer, Todd Holmes,  
655 Michael Rosbash and Charlotte Helfrich-Forster for kindly sharing fly lines, Jaimin Bhatt for

656 help with dissections for immunohistochemistry experiment, Mr. Prajwal and Ms. Suma for  
657 help with imaging and Rajanna and Muniraju for technical assistance. We are extremely  
658 grateful to Abhilash Lakshman for useful discussions regarding statistics for  
659 immunohistochemistry experiment data, for help with running the CATCosinor function  
660 from the CATkit package and writing custom codes in Plotly for plotting polar plots in R. We  
661 also thank Prof. Gaiti Hasan for useful discussions and inputs at various stages of this  
662 project.

663 **Table 1: Known roles of *Innexins* in flies**

664

| <b>Gene</b>                         | <b>Functions</b>                                                                       | <b>References</b>                                |
|-------------------------------------|----------------------------------------------------------------------------------------|--------------------------------------------------|
| <i>Innexin1</i><br>( <i>Ogre</i> )  | Development of nervous system and optic lobes                                          | Lipshitz & Kankel, 1985<br>Holcroft et al., 2013 |
|                                     | Escape response to sound stimuli                                                       | Pézier et al., 2016                              |
| <i>Innexin2</i>                     | Development of gut, tracheal systems, salivary glands, epithelial tissue morphogenesis | (Bauer et al., 2003)<br>(Bauer et al., 2004)     |
|                                     | Development of nervous system                                                          | (Holcroft et al., 2013)                          |
|                                     | Development of eye                                                                     | Richard & Hoch, 2015                             |
| <i>Innexin3</i>                     | Dorsal closure in embryonic stages                                                     | (Giuliani et al., 2013)                          |
|                                     | Escape response to sound stimuli                                                       | Pézier et al., 2016                              |
| <i>Innexin4</i><br>( <i>Zpg</i> )   | Germ line cell development                                                             | Bohrmann & Zimmermann, 2008                      |
| <i>Innexin5</i>                     | Visual learning and memory                                                             | Liu et al., 2016                                 |
| <i>Innexin6</i>                     | Associative learning and anaesthesia-resistant memory                                  | (C. L. Wu et al., 2011)                          |
|                                     | Visual learning and memory                                                             | (Liu et al., 2016)                               |
|                                     | Escape response to sound stimuli                                                       | (Pézier et al., 2016)                            |
|                                     | Modulating behavioural responses during sleep                                          | Troup et al., 2018                               |
| <i>Innexin7</i>                     | Development of nervous system                                                          | (Ostrowski et al., 2008)                         |
|                                     | Associative learning and anaesthesia-resistant memory                                  | C. L. Wu et al., 2011                            |
| <i>Innexin8</i><br>( <i>ShakB</i> ) | Synaptic transmission in the giant fibre system (GFS)                                  | (Phelan et al., 2008)                            |
|                                     | Transmission of olfactory information in the antennal lobe                             | Yaksi & Wilson, 2010                             |

665 **Table 2: Effect of knockdown of *Innexins* in circadian pacemakers using *tim GAL4* driver on**  
 666 **free running rhythm properties**

667

668

669

670

671

672

673

674

675

676

677

678

679

680

681

| Genotype                       | Period       | Power of rhythm | % Rhythmicity |
|--------------------------------|--------------|-----------------|---------------|
| <i>w; tim GAL4; dcr</i>        | 23.65 ± 0.01 | 419.2 ± 13.19   | 100           |
| <i>tim; dcr &gt; Inx1 RNAi</i> | 25.78 ± 0.07 | 385.3 ± 14.55   | 100           |
| <i>tim; dcr &gt; Inx2 RNAi</i> | 24.61 ± 0.07 | 377 ± 13.5      | 100           |
| <i>tim; dcr &gt; Inx3 RNAi</i> | 23.62 ± 0.01 | 409.4 ± 16.76   | 100           |
| <i>tim; dcr &gt; Inx4 RNAi</i> | 23.87 ± 0.09 | 325.8 ± 14.28   | 81.8          |
| <i>tim; dcr &gt; Inx5 RNAi</i> | 23.52 ± 0.03 | 321.2 ± 6.9     | 95.23         |
| <i>tim; dcr &gt; Inx6 RNAi</i> | 23.8 ± 0.06  | 376.5 ± 18.17   | 95.23         |
| <i>tim; dcr &gt; Inx7 RNAi</i> | 23.73 ± 0.05 | 337.2 ± 91.18   | 100           |
| <i>tim; dcr &gt; Inx8 RNAi</i> | 23.58 ± 0.04 | 461.3 ± 13.44   | 100           |
| <i>yscv; +; Inx1 RNAi</i>      | 23.5 ± 0.03  | 393.8 ± 13.24   | 100           |
| <i>yscv; +; Inx2 RNAi</i>      | 23.54 ± 0.02 | 424.2 ± 16.55   | 92.59         |
| <i>yscv; +; Inx3 RNAi</i>      | 23.56 ± 0.02 | 466.1 ± 20.9    | 100           |
| <i>yscv; +; Inx4 RNAi</i>      | 23.49 ± 0.03 | 327.5 ± 11.34   | 95.83         |
| <i>yscv; +; Inx5 RNAi</i>      | 23.19 ± 0.04 | 314.6 ± 14.84   | 96            |
| <i>yscv; +; Inx6 RNAi</i>      | 23.43 ± 0.02 | 437.2 ± 14.4    | 100           |
| <i>yscv; +; Inx7 RNAi</i>      | 23.56 ± 0.03 | 410.9 ± 51.2    | 96.15         |
| <i>yscv; +; Inx8 RNAi</i>      | 23.5 ± 0.03  | 454.6 ± 19.17   | 100           |

682 **Table 3: Effect of knockdown of *Innexin2* in smaller subsets of circadian pacemakers on**  
683 **free running rhythm properties**

684

| Genotype                           | Period       | Power of rhythm |
|------------------------------------|--------------|-----------------|
| <i>pdf; dcr &gt; Inx2 RNAi</i>     | 23.65 ± 0.04 | 243.8 ± 10.4    |
| <i>Dvpdf &gt; dcr; Inx2 RNAi</i>   | 25.7 ± 0.16  | 234.4 ± 11.1    |
| <i>Clk4.1M &gt; dcr; Inx2 RNAi</i> | 23.76 ± 0.04 | 358.8 ± 9.9     |
| <i>Clk4.5F &gt; dcr; Inx2 RNAi</i> | 23.87 ± 0.04 | 372.9 ± 19.7    |
| <i>repo &gt; Inx2 RNAi</i>         | 23.9 ± 0.14  | 169.4 ± 12.8    |
| <i>w; pdfGAL4; +</i>               | 23.26 ± 0.08 | 239.16 ± 7.89   |
| <i>yw; dvpdfGAL4; +</i>            | 24.14 ± 0.04 | 295 ± 17.2      |
| <i>w; +; Clk4.1MGAL4</i>           | 23.5 ± 0.05  | 359.2 ± 15.7    |
| <i>w; +; Clk4.5F GAL4</i>          | 23.72 ± 0.06 | 294.6 ± 13.3    |
| <i>w; +; repo GAL4</i>             | 23.7 ± 0.07  | 188.5 ± 11.8    |
| <i>yscv; +; Inx2 RNAi</i>          | 23.65 ± 0.07 | 143.1 ± 5.57    |
| <i>w; dcr; Inx2 RNAi</i>           | 23.8 ± 0.04  | 385.9 ± 18.29   |

695

696

697

698

699



700 **Table 4: Rhythm properties of PERIOD expression in distinct cell groups of control and**  
 701 **experimental genotypes**

| Cell type                          | Period | p value  | PR    | Amplitude $\pm$ SE | Phase $\pm$ SE      |
|------------------------------------|--------|----------|-------|--------------------|---------------------|
| s-LNv control                      | 24-h   | 1.38e-14 | 62.53 | 32.62 $\pm$ 3.13   | -320.67 $\pm$ 5.76  |
| s-LNv experimental                 | 24-h   | 4.12e-13 | 61.34 | 24.81 $\pm$ 2.54   | -45.89 $\pm$ 6.66   |
| l-LNv control                      | 24-h   | 7.57e-05 | 24.98 | 10.68 $\pm$ 2.28   | -297.50 $\pm$ 13.52 |
| l-LNv experimental                 | 24-h   | 6.85e-05 | 27.35 | 11.51 $\pm$ 2.44   | -75.76 $\pm$ 12.83  |
| 5 <sup>th</sup> s-LNv control      | 24-h   | 0.005    | 26.78 | 28.18 $\pm$ 8.49   | -311.54 $\pm$ 13.3  |
| 5 <sup>th</sup> s-LNv experimental | 24-h   | 0.36     | 5.09  | 7.70 $\pm$ 5.79    | -0.06 $\pm$ 33.28   |
| LNd control                        | 24-h   | 9.89e-05 | 30.84 | 19.11 $\pm$ 4.06   | -306.95 $\pm$ 10.85 |
| LNd experimental                   | 24-h   | 4.54e-05 | 29.16 | 14.19 $\pm$ 2.9    | -43.72 $\pm$ 13.89  |
| DN1 control                        | 24-h   | 0.007    | 17.86 | 9.88 $\pm$ 3.01    | -257.73 $\pm$ 15.68 |
| DN1 experimental                   | 24-h   | 0.15     | 6.42  | 6.51 $\pm$ 3.32    | -52.54 $\pm$ 33.44  |
| DN2 control                        | 24-h   | 0.97     | 0.16  | 0.86 $\pm$ 3.89    | -44.09 $\pm$ 214.23 |
| DN2 experimental                   | 24-h   | 0.73     | 1.61  | 2.21 $\pm$ 2.9     | -25.65 $\pm$ 86.24  |
| PDF in DP control                  | 24-h   | 1.38e-07 | 34.01 | 1.16 $\pm$ 0.18    | -51.30 $\pm$ 8.7    |
| PDF in DP experimental             | 24-h   | 6.25e-13 | 58.44 | 2.30 $\pm$ 0.24    | -64.10 $\pm$ 6.3    |

702

703

704

705 **References**

706 Abhilash, L., & Sheeba, V. (2019). RhythmicAlly: Your R and Shiny–Based Open-Source Ally  
707 for the Analysis of Biological Rhythms. *Journal of Biological Rhythms*, 34(5), 551–561.  
708 <https://doi.org/10.1177/0748730419862474>

709 Allada, R., & Chung, B. Y. (2010). Circadian Organization of Behavior and Physiology in  
710 *Drosophila*. *Annual Review of Physiology*, 72(1), 605–624.  
711 <https://doi.org/10.1146/annurev-physiol-021909-135815>

712 Bauer, R., Lehmann, C., Fuss, B., Eckardt, F., & Hoch, M. (2002). The *Drosophila* gap junction  
713 channel gene innexin 2 controls foregut development in response to Wingless  
714 signalling. *Journal of Cell Science*, 115(9), 1859–1867.

715 Bauer, R., Lehmann, C., Martini, J., Eckardt, F., & Hoch, M. (2004). Gap Junction Channel  
716 Protein Innexin 2 Is Essential for Epithelial Morphogenesis in the *Drosophila* Embryo.  
717 *Molecular Biology of the Cell*, 15, 2992–3004. <https://doi.org/10.1091/mbc.E04>

718 Bauer, R., Löer, B., Ostrowski, K., Martini, J., Weimbs, A., Lechner, H., & Hoch, M. (2005).  
719 Intercellular communication: The *Drosophila* innexin multiprotein family of gap  
720 junction proteins. *Chemistry and Biology*, 12(5), 515–526.  
721 <https://doi.org/10.1016/j.chembiol.2005.02.013>

722 Bauer, R., Martini, J., Lehmann, C., & Hoch, M. (2003). Cellular Distribution of Innexin 1 and  
723 2 Gap Junctional Channel Proteins in Epithelia of the *Drosophila* Embryo. *Cell*  
724 *Communication and Adhesion*, 10(42100), 221–225. [https://doi.org/10.1080/cac.10.4-](https://doi.org/10.1080/cac.10.4-6.221.225)  
725 [6.221.225](https://doi.org/10.1080/cac.10.4-6.221.225)

- 726 Beckwith, E. J., & Ceriani, M. F. (2015). Communication between circadian clusters: The key  
727 to a plastic network. *FEBS Letters*, *589*(22), 3336–3342.  
728 <https://doi.org/10.1016/j.febslet.2015.08.017>
- 729 Beyer, E. C., & Berthoud, V. M. (2018). Gap junction gene and protein families: Connexins,  
730 innexins, and pannexins. *Biochimica et Biophysica Acta - Biomembranes*, *1860*(1), 5–8.  
731 <https://doi.org/10.1016/j.bbamem.2017.05.016>
- 732 Bohrmann, J., & Zimmermann, J. (2008). Gap junctions in the ovary of *Drosophila*  
733 *melanogaster*: Localization of innexins 1, 2, 3 and 4 and evidence for intercellular  
734 communication via innexin-2 containing channels. *BMC Developmental Biology*, *8*, 1–  
735 12. <https://doi.org/10.1186/1471-213X-8-111>
- 736 Cao, G., & Nitabach, M. N. (2008). *Circadian Control of Membrane Excitability in Drosophila*  
737 *melanogaster Lateral Ventral Clock Neurons*. [https://doi.org/10.1523/JNEUROSCI.1503-](https://doi.org/10.1523/JNEUROSCI.1503-08.2008)  
738 [08.2008](https://doi.org/10.1523/JNEUROSCI.1503-08.2008)
- 739 Colwell, C. S. (2000). Rhythmic coupling among cells in the suprachiasmatic nucleus. *Journal*  
740 *of Neurobiology*, *43*(4), 379–388. [https://doi.org/10.1002/1097-](https://doi.org/10.1002/1097-4695(20000615)43:4<379::AID-NEU6>3.0.CO;2-0)  
741 [4695\(20000615\)43:4<379::AID-NEU6>3.0.CO;2-0](https://doi.org/10.1002/1097-4695(20000615)43:4<379::AID-NEU6>3.0.CO;2-0)
- 742 Cornelissen, G. (2014). *Cosinor-based rhythmometry*. [https://doi.org/10.1186/1742-4682-](https://doi.org/10.1186/1742-4682-11-16)  
743 [11-16](https://doi.org/10.1186/1742-4682-11-16)
- 744 Delventhal, R., O'Connor, R. M., Pantalia, M. M., Ulgherait, M., Kim, H. X., Basturk, M. K.,  
745 Canman, J. C., & Shirasu-Hiza, M. (2019). Dissection of central clock function in  
746 *drosophila* through cell-specific CRISPR-mediated clock gene disruption. *ELife*, *8*, 1–24.  
747 <https://doi.org/10.7554/eLife.48308>

- 748 Depetris-Chauvin, A., Berni, J., Aranovich, E. J., Muraro, N. I., Beckwith, E. J., & Ceriani, M. F.  
749 (2011). Adult-specific electrical silencing of pacemaker neurons uncouples molecular  
750 clock from circadian outputs. *Current Biology*, 21(21), 1783–1793.  
751 <https://doi.org/10.1016/j.cub.2011.09.027>
- 752 Diemer, T., Landgraf, D., Noguchi, T., Pan, H., Moreno, J. L., & Welsh, D. K. (2017). Cellular  
753 circadian oscillators in the suprachiasmatic nucleus remain coupled in the absence of  
754 connexin-36. *Neuroscience*, 357(June), 1–11.  
755 <https://doi.org/10.1016/j.neuroscience.2017.05.037>
- 756 Dissel, S., Hansen, C. N., Özkaya, Ö., Hemsley, M., Kyriacou, C. P., & Rosato, E. (2014). The  
757 logic of circadian organization in drosophila. *Current Biology*, 24(19), 2257–2266.  
758 <https://doi.org/10.1016/j.cub.2014.08.023>
- 759 Evans, J. A., & Gorman, M. R. (2016). In synch but not in step: Circadian clock circuits  
760 regulating plasticity in daily rhythms. In *Neuroscience* (Vol. 320, pp. 259–280). Elsevier  
761 Ltd. <https://doi.org/10.1016/j.neuroscience.2016.01.072>
- 762 Faber, D. S., & Pereda, A. E. (2018). Two forms of electrical transmission between neurons.  
763 *Frontiers in Molecular Neuroscience*, 11(November), 1–11.  
764 <https://doi.org/10.3389/fnmol.2018.00427>
- 765 Fields, R. D., Eshete, F., Stevens, B., & Itoh, K. (1997). *Action Potential-Dependent Regulation*  
766 *of Gene Expression: Temporal Specificity in Ca<sup>2+</sup>, cAMP-Responsive Element Binding*  
767 *Proteins, and Mitogen-Activated Protein Kinase Signaling*.
- 768 Giuliani, F., Giuliani, G., Bauer, R., & Rabouille, C. (2013). *Innexin 3, a New Gene Required for*  
769 *Dorsal Closure in Drosophila Embryo*. 8(7), 1–16.

- 770 <https://doi.org/10.1371/journal.pone.0069212>
- 771 Grima, B., Chélot, E., Xia, R., & Rouyer, F. (2004). Morning and evening peaks of activity rely  
772 on different clock neurons of the *Drosophila* brain. *Nature*, *431*(7010), 869–873.  
773 <https://doi.org/10.1038/nature02935>
- 774 Güiza, J., Barría, I., Sáez, J. C., & Vega, J. L. (2018). Innexins: Expression, regulation, and  
775 functions. *Frontiers in Physiology*, *9*(OCT), 1–9.  
776 <https://doi.org/10.3389/fphys.2018.01414>
- 777 Gummadova, J. O., Coutts, G. A., Robert, N., & Glossop, J. (2009). Analysis of the *Drosophila*  
778 Clock Promoter Reveals Heterogeneity in expression between Subgroups of Central  
779 Oscillator Cells and Identifies a Novel enhancer Region. *JOURNAL OF BIOLOGICAL*  
780 *RHYTHMS*, *24*(5), 353–367. <https://doi.org/10.1177/0748730409343890>
- 781 Hardin, P. E. (2005). The circadian timekeeping system of *Drosophila*. *Current Biology*,  
782 *15*(17), 714–722. <https://doi.org/10.1016/j.cub.2005.08.019>
- 783 Helfrich-Förster, C. (1998). Robust circadian rhythmicity of *Drosophila melanogaster*  
784 requires the presence of lateral neurons: A brain-behavioral study of disconnected  
785 mutants. *Journal of Comparative Physiology - A Sensory, Neural, and Behavioral*  
786 *Physiology*, *182*(4), 435–453. <https://doi.org/10.1007/s003590050192>
- 787 Helfrich-Förster, Charlotte, Täuber, M., Park, J. H., Mühlig-Versen, M., Schneuwly, S., &  
788 Hofbauer, A. (2000). Ectopic expression of the neuropeptide pigment-dispersing factor  
789 alters behavioral rhythms in *Drosophila melanogaster*. *Journal of Neuroscience*, *20*(9),  
790 3339–3353. <https://doi.org/10.1523/jneurosci.20-09-03339.2000>
- 791 Herzog, E. D., Hermanstynne, T., Smyllie, N. J., & Hastings, M. H. (2017). Regulating the

- 792       suprachiasmatic nucleus (SCN) circadian clockwork: Interplay between cell-  
793       autonomous and circuit-level mechanisms. *Cold Spring Harbor Perspectives in Biology*,  
794       9(1). <https://doi.org/10.1101/cshperspect.a027706>
- 795   Holcroft, C. E., Jackson, W. D., Lin, W. H., Bassiri, K., Baines, R. A., & Phelan, P. (2013).  
796       Innexins *ogre* and *inx2* are required in glial cells for normal postembryonic  
797       development of the drosophila central nervous system. *Journal of Cell Science*, 126(17),  
798       3823–3834. <https://doi.org/10.1242/jcs.117994>
- 799   Hyun, S., Lee, Y., Hong, S. T., Bang, S., Paik, D., Kang, J., Shin, J., Lee, J., Jeon, K., Hwang, S.,  
800       Bae, E., & Kim, J. (2005). *Drosophila* GPCR *han* is a receptor for the circadian clock  
801       neuropeptide PDF. *Neuron*, 48(2), 267–278.  
802       <https://doi.org/10.1016/j.neuron.2005.08.025>
- 803   Jiang, Z. G., Yang, Y. Q., & Allen, C. N. (1997). Tracer and electrical coupling of rat  
804       suprachiasmatic nucleus neurons. *Neuroscience*, 77(4), 1059–1066.  
805       [https://doi.org/10.1016/S0306-4522\(96\)00539-8](https://doi.org/10.1016/S0306-4522(96)00539-8)
- 806   Klarsfeld, A., Leloup, J. C., & Rouyer, F. (2003). Circadian rhythms of locomotor activity in  
807       *Drosophila*. *Behavioural Processes*, 64(2), 161–175. [https://doi.org/10.1016/S0376-](https://doi.org/10.1016/S0376-6357(03)00133-5)  
808       6357(03)00133-5
- 809   Landgraf, D., Koch, C. E., & Oster, H. (2014). Embryonic development of circadian clocks in  
810       the mammalian suprachiasmatic nuclei. *Frontiers in Neuroanatomy*, 8(DEC), 1–7.  
811       <https://doi.org/10.3389/fnana.2014.00143>
- 812   Lee Gierke, C., & Cornelissen, G. (2016). Chronomics analysis toolkit (CATkit). *Biological*  
813       *Rhythm Research*, 47(2), 163–181. <https://doi.org/10.1080/09291016.2015.1094965>

- 814 Lee, P. R., Cohen, J. E., Iacobas, D. A., Iacobas, S., & Fields, & R. D. (2017). *Gene networks*  
815 *activated by specific patterns of action potentials in dorsal root ganglia neurons OPEN.*  
816 <https://doi.org/10.1038/srep43765>
- 817 Liang, X., Holy, T. E., & Taghert, P. H. (2016). Synchronous drosophila circadian pacemakers  
818 display nonsynchronous Ca<sup>2+</sup> rhythms in vivo. *Science*, *351*(6276), 976–981.  
819 <https://doi.org/10.1126/science.aad3997>
- 820 Lipshitz, H. D., & Kankel, D. R. (1985). Specificity of gene action during central nervous  
821 system development in *Drosophila melanogaster*: Analysis of the lethal (1) optic  
822 ganglion reduced locus. *Developmental Biology*, *108*(1), 56–77.  
823 [https://doi.org/10.1016/0012-1606\(85\)90009-0](https://doi.org/10.1016/0012-1606(85)90009-0)
- 824 Liu, Q., Yang, X., Tian, J., Gao, Z., Wang, M., Li, Y., & Guo, A. (2016). Gap junction networks in  
825 mushroom bodies participate in visual learning and memory in *Drosophila*. *ELife*,  
826 *5*(MAY2016), 1–18. <https://doi.org/10.7554/eLife.13238>
- 827 Long, M. A., Jutras, M. J., Connors, B. W., & Burwell, R. D. (2005). Electrical synapses  
828 coordinate activity in the suprachiasmatic nucleus. *Nature Neuroscience*, *8*(1), 61–66.  
829 <https://doi.org/10.1038/nn1361>
- 830 McGuire, S. E., Mao, Z., & Davis, R. L. (2004). Spatiotemporal gene expression targeting with  
831 the TARGET and gene-switch systems in *Drosophila*. *Science's STKE : Signal*  
832 *Transduction Knowledge Environment*, *2004*(220), pl6–pl6.  
833 <https://doi.org/10.1126/stke.2202004pl6>
- 834 Mertens, I., Vandingenen, A., Johnson, E. C., Shafer, O. T., Li, W., Trigg, J. S., De Loof, A.,  
835 Schoofs, L., & Taghert, P. H. (2005). PDF receptor signaling in *Drosophila* contributes to

- 836 both circadian and geotactic behaviors. *Neuron*, 48(2), 213–219.
- 837 <https://doi.org/10.1016/j.neuron.2005.09.009>
- 838 Mizrak, D., Ruben, M., Myers, G. N., Rhrissorrakrai, K., Gunsalus, K. C., & Blau, J. (2012).
- 839 Electrical activity can impose time of day on the circadian transcriptome of pacemaker
- 840 neurons. *Current Biology*, 22(20), 1871–1880.
- 841 <https://doi.org/10.1016/j.cub.2012.07.070>
- 842 Moore, R. Y., & Bernstein, M. E. (1989). Synaptogenesis in the rat suprachiasmatic nucleus
- 843 demonstrated by electron microscopy and synapsin I immunoreactivity. *Journal of*
- 844 *Neuroscience*, 9(6), 2151–2162. <https://doi.org/10.1523/jneurosci.09-06-02151.1989>
- 845 Nagy, J. I., Pereda, A. E., & Rash, J. E. (2018). Biochimica et Biophysica Acta Electrical
- 846 synapses in mammalian CNS : Past eras , present focus and future directions ☆. *BBA -*
- 847 *Biomembranes*, 1860(1), 102–123. <https://doi.org/10.1016/j.bbamem.2017.05.019>
- 848 Nielsen, M. S., Axelsen, L. N., Sorgen, P. L., Verma, V., Delmar, M., & Holstein-Rathlou, N. H.
- 849 (2012). Gap junctions. *Comprehensive Physiology*, 2(3), 1981–2035.
- 850 <https://doi.org/10.1002/cphy.c110051>
- 851 Nitabach, M. N., Blau, J., & Holmes, T. C. (2002). Electrical silencing of *Drosophila* pacemaker
- 852 neurons stops the free-running circadian clock. *Cell*, 109(4), 485–495.
- 853 [https://doi.org/10.1016/S0092-8674\(02\)00737-7](https://doi.org/10.1016/S0092-8674(02)00737-7)
- 854 Nitabach, M. N., Wu, Y., Sheeba, V., Lemon, W. C., Strumbos, J., Zelensky, P. K., White, B. H.,
- 855 & Holmes, T. C. (2006). Electrical hyperexcitation of lateral ventral pacemaker neurons
- 856 desynchronizes downstream circadian oscillators in the fly circadian circuit and induces
- 857 multiple behavioral periods. *Journal of Neuroscience*, 26(2), 479–489.



- 858 <https://doi.org/10.1523/JNEUROSCI.3915-05.2006>
- 859 Ostrowski, K., Bauer, R., & Hoch, M. (2008). The *Drosophila* Innexin7 gap junction protein is  
860 required for development of the embryonic nervous system. *Cell Communication and*  
861 *Adhesion*, 15(1–2), 155–167. <https://doi.org/10.1080/15419060802013976>
- 862 Park, J. H., Helfrich-Förster, C., Lee, G., Liu, L., Rosbash, M., & Hall, J. C. (2000). Differential  
863 regulation of circadian pacemaker output by separate clock genes in *Drosophila*.  
864 *Proceedings of the National Academy of Sciences of the United States of America*, 97(7),  
865 3608–3613. <https://doi.org/10.1073/pnas.97.7.3608>
- 866 Peng, Y., Stoleru, D., Levine, J. D., Hall, J. C., & Rosbash, M. (2003). *Drosophila* free-running  
867 rhythms require intercellular communication. *PLoS Biology*, 1(1), 32–40.  
868 <https://doi.org/10.1371/journal.pbio.0000013>
- 869 Pereda, A. E. (2014). Electrical synapses and their functional interactions with chemical  
870 synapses. *Nature Reviews Neuroscience*, 15(4), 250–263.  
871 <https://doi.org/10.1038/nrn3708>
- 872 Pézier, A. P., Jezzini, S. H., Bacon, J. P., & Blagburn, J. M. (2016). *Shaking B Mediates Synaptic*  
873 *Coupling between Auditory Sensory Neurons and the Giant Fiber of Drosophila*  
874 *melanogaster*. 1–22. <https://doi.org/10.1371/journal.pone.0152211>
- 875 Phelan, P., Goulding, L. A., Tam, J. L. Y., Allen, M. J., Dawber, R. J., Davies, J. A., & Bacon, J. P.  
876 (2008). Molecular Mechanism of Rectification at Identified Electrical Synapses in the  
877 *Drosophila* Giant Fiber System. *Current Biology*, 18(24), 1955–1960.  
878 <https://doi.org/10.1016/j.cub.2008.10.067>
- 879 Rash, J. E., Olson, C. O., Pouliot, W. A., Davidson, K. G. V, Yasumura, T., Furman, C. S., Royer,

- 880 S., Kamasawa, N., Nagy, J. I., & Dudek, F. E. (2007). Connexin36 vs. Connexin32,  
881 “Miniature” Neuronal Gap Junctions, and Limited Electrotonic Coupling in Rodent  
882 Suprachiasmatic Nucleus. In *Neuroscience* (Vol. 149, Issue 2).
- 883 Renn, S. C. P., Park, J. H., Rosbash, M., Hall, J. C., & Taghert, P. H. (1999). A pdf neuropeptide  
884 gene mutation and ablation of PDF neurons each cause severe abnormalities of  
885 behavioral circadian rhythms in *Drosophila*. *Cell*, *99*(7), 791–802.  
886 [https://doi.org/10.1016/S0092-8674\(00\)81676-1](https://doi.org/10.1016/S0092-8674(00)81676-1)
- 887 Richard, M., & Hoch, M. (2015). *Drosophila* eye size is determined by Innexin 2-dependent  
888 Decapentaplegic signalling. *Developmental Biology*, *408*(1), 26–40.  
889 <https://doi.org/10.1016/j.ydbio.2015.10.011>
- 890 Roberts, L., Leise, T. L., Noguchi, T., Galschiodt, A. M., Houl, J. H., Welsh, D. K., & Holmes, T.  
891 C. (2015). Light evokes rapid circadian network oscillator desynchrony followed by  
892 gradual phase retuning of synchrony. *Current Biology*, *25*(7), 858–867.  
893 <https://doi.org/10.1016/j.cub.2015.01.056>
- 894 Schindelin, J., Arganda-Carreras, I., Frise, E., Kaynig, V., Longair, M., Pietzsch, T., Preibisch, S.,  
895 Rueden, C., Saalfeld, S., Schmid, B., Tinevez, J. Y., White, D. J., Hartenstein, V., Eliceiri,  
896 K., Tomancak, P., & Cardona, A. (2012). Fiji: An open-source platform for biological-  
897 image analysis. *Nature Methods*, *9*(7), 676–682. <https://doi.org/10.1038/nmeth.2019>
- 898 Schlichting, M., Díaz, M. M., Xin, J., & Rosbash, M. (2019). Neuron-specific knockouts  
899 indicate the importance of network communication to *drosophila* rhythmicity. *ELife*, *8*,  
900 1–20. <https://doi.org/10.7554/eLife.48301>
- 901 Schneider, N. L., & Stengl, M. (2006). Gap junctions between accessory medulla neurons

- 902 appear to synchronize circadian clock cells of the cockroach *Leucophaea maderae*.  
903 *Journal of Neurophysiology*, 95(3), 1996–2002. <https://doi.org/10.1152/jn.00835.2005>
- 904 Shafer, O. T., Kim, D. J., Dunbar-Yaffe, R., Nikolaev, V. O., Lohse, M. J., & Taghert, P. H.  
905 (2008). Widespread Receptivity to Neuropeptide PDF throughout the Neuronal  
906 Circadian Clock Network of *Drosophila* Revealed by Real-Time Cyclic AMP Imaging.  
907 *Neuron*, 58(2), 223–237. <https://doi.org/10.1016/j.neuron.2008.02.018>
- 908 Shafer, O. T., Rosbash, M., & Truman, J. W. (2002). Sequential nuclear accumulation of the  
909 clock proteins period and timeless in the pacemaker neurons of *Drosophila*  
910 melanogaster. *Journal of Neuroscience*, 22(14), 5946–5954.  
911 <https://doi.org/10.1523/jneurosci.22-14-05946.2002>
- 912 Shafer, O. T., & Yao, Z. (2014). Pigment-dispersing factor signaling and circadian rhythms in  
913 insect locomotor activity. In *Current Opinion in Insect Science* (Vol. 1, pp. 73–80).  
914 Elsevier Inc. <https://doi.org/10.1016/j.cois.2014.05.002>
- 915 Sheeba, V. (2008). The *Drosophila melanogaster* circadian pacemaker circuit. *Journal of*  
916 *Genetics*, 87(5), 485–493. <https://doi.org/10.1007/s12041-008-0071-x>
- 917 Sheeba, V., Gu, H., Sharma, V. K., O’Dowd, D. K., & Holmes, T. C. (2008). Circadian- and light-  
918 dependent regulation of resting membrane potential and spontaneous action potential  
919 firing of *Drosophila* circadian pacemaker neurons. *Journal of Neurophysiology*, 99(2),  
920 976–988. <https://doi.org/10.1152/jn.00930.2007>
- 921 Sheeba, V., Kaneko, M., Sharma, V. K., & Holmes, T. C. (2008). The *Drosophila* circadian  
922 pacemaker circuit: Pas de Deux or Tarantella? *Critical Reviews in Biochemistry and*  
923 *Molecular Biology*, 43(1), 37–61. <https://doi.org/10.1080/10409230701829128>

- 924 Sheeba, V., Sharma, V. K., Gu, H., Chou, Y. T., O'Dowd, D. K., & Holmes, T. C. (2008). Pigment  
925 dispersing factor-dependent and -independent circadian locomotor behavioral  
926 rhythms. *Journal of Neuroscience*, *28*(1), 217–227.  
927 <https://doi.org/10.1523/JNEUROSCI.4087-07.2008>
- 928 Shinohara, K., Hiruma, H., Funabashi, T., & Kimura, F. (2000). GABAergic modulation of gap  
929 junction communication in slice cultures of the rat suprachiasmatic nucleus.  
930 *Neuroscience*, *96*(3), 591–596. [https://doi.org/10.1016/S0306-4522\(99\)00556-4](https://doi.org/10.1016/S0306-4522(99)00556-4)
- 931 Stebbings, L. A., Todman, M. G., Phelan, P., Bacon, J. P., & Davies, J. A. (2000). Two  
932 *Drosophila* innexins are expressed in overlapping domains and cooperate to form gap-  
933 junction channels. *Molecular Biology of the Cell*, *11*(7), 2459–2470.  
934 <https://doi.org/10.1091/mbc.11.7.2459>
- 935 Stoleru, D., Peng, Y., Agosto, J., & Rosbash, M. (2004). Coupled oscillators control morning  
936 and evening locomotor behaviour of *Drosophila*. *Nature*, *431*(7010), 862–868.  
937 <https://doi.org/10.1038/nature02926>
- 938 Stoleru, D., Peng, Y., Nawathean, P., & Rosbash, M. (2005). A resetting signal between  
939 *Drosophila* pacemakers synchronizes morning and evening activity. *Nature*, *438*(7065),  
940 238–242. <https://doi.org/10.1038/nature04192>
- 941 Troup, M., Yap, M. H. W., Rohrscheib, C., Grabowska, M. J., Ertekin, D., Randeniya, R.,  
942 Kottler, B., Larkin, O., Munro, K., Shaw, P. J., & van Swinderen, B. (2018). Acute control  
943 of the sleep switch in *Drosophila* reveals a role for gap junctions in regulating  
944 behavioral responsiveness. *eLife*, *7*, 1–22. <https://doi.org/10.7554/eLife.37105>
- 945 Wang, M. H., Chen, N., & Wang, J. H. (2014). The coupling features of electrical synapses

- 946 modulate neuronal synchrony in hypothalamic superchiasmatic nucleus. *Brain*  
947 *Research*, 1550, 9–17. <https://doi.org/10.1016/j.brainres.2014.01.007>
- 948 Welsh, D. K., & Reppert, S. M. (1996). Gap junctions couple astrocytes but not neurons in  
949 dissociated cultures of rat suprachiasmatic nucleus. *Brain Research*, 706(1), 30–36.  
950 [https://doi.org/10.1016/0006-8993\(95\)01172-2](https://doi.org/10.1016/0006-8993(95)01172-2)
- 951 Wu, C. L., Shih, M. F. M., Lai, J. S. Y., Yang, H. T., Turner, G. C., Chen, L., & Chiang, A. S.  
952 (2011). Heterotypic gap junctions between two neurons in the drosophila brain are  
953 critical for memory. *Current Biology*, 21(10), 848–854.  
954 <https://doi.org/10.1016/j.cub.2011.02.041>
- 955 Wu, L., Dong, A., Dong, L., Wang, S. Q., & Li, Y. (2019). PARIS, an optogenetic method for  
956 functionally mapping gap junctions. *ELife*, 8, 1–22. <https://doi.org/10.7554/eLife.43366>
- 957 Wülbeck, C., Grieshaber, E., & Helfrich-Förster, C. (2008). Pigment-dispersing factor (PDF)  
958 has different effects on *Drosophila*'s circadian clocks in the accessory medulla and in  
959 the dorsal brain. *Journal of Biological Rhythms*, 23(5), 409–424.  
960 <https://doi.org/10.1177/0748730408322699>
- 961 Yaksi, E., & Wilson, R. I. (2010). Electrical Coupling between Olfactory Glomeruli. *Neuron*,  
962 67(6), 1034–1047. <https://doi.org/10.1016/j.neuron.2010.08.041>
- 963 Yang, Z., & Sehgal, A. (2001). Role of molecular oscillations in generating behavioral rhythms  
964 in *Drosophila*. *Neuron*, 29(2), 453–467. [https://doi.org/10.1016/S0896-6273\(01\)00218-](https://doi.org/10.1016/S0896-6273(01)00218-5)  
965 5
- 966 Yao, Z., & Shafer, O. T. (2014). The *Drosophila* Circadian Clock Is a variably coupled network  
967 of multiple peptidergic units *Science (New York, N.Y.)*, 343(March), 1516–1520.

968 <https://doi.org/10.1126/science.1251285>

969 Yoshii, T., Wülbeck, C., Sehadova, H., Veleri, S., Bichler, D., Stanewsky, R., & Helfrich-Förster,

970 C. (2009). The neuropeptide pigment-dispersing factor adjusts period and phase of

971 *Drosophila's* clock. *Journal of Neuroscience*, 29(8), 2597–2610.

972 <https://doi.org/10.1523/JNEUROSCI.5439-08.2009>

973 Zhang, L., Chung, B. Y., Lear, B. C., Kilman, V. L., Liu, Y., Mahesh, G., Meissner, R. A., Hardin,

974 P. E., & Allada, R. (2010). DN1p Circadian Neurons Coordinate Acute Light and PDF

975 Inputs to Produce Robust Daily Behavior in *Drosophila*. *Current Biology*, 20(7), 591–599.

976 <https://doi.org/10.1016/j.cub.2010.02.056>

977

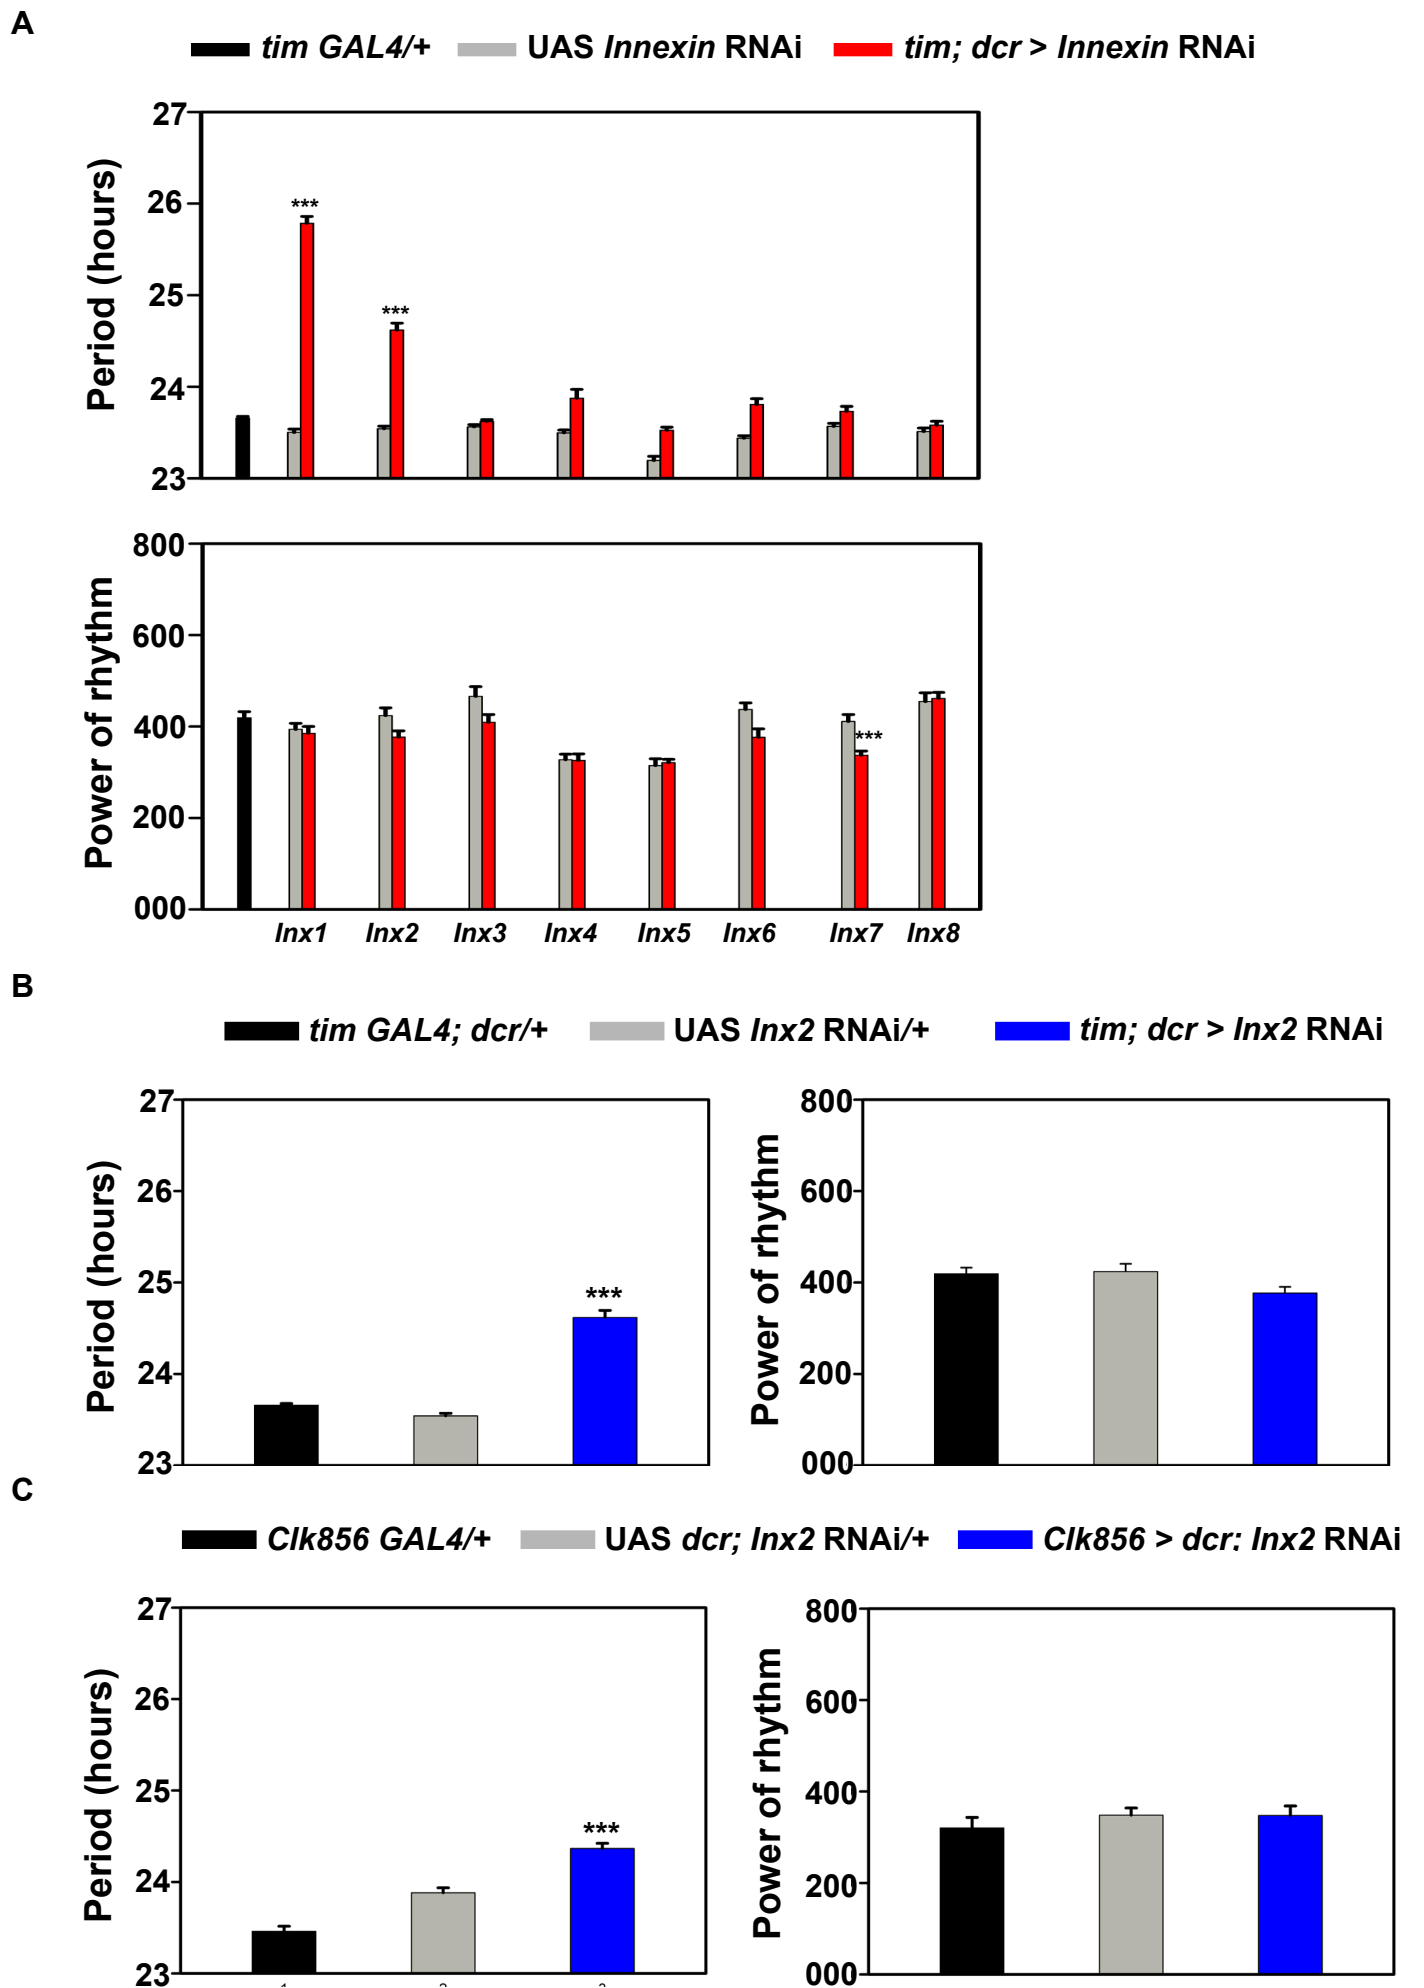

**Figure 1:** RNA interference screen of *Innexins* in the clock neurons under DD 25°C.

**A**

*pdf GAL4; dcr/+*    
  *UAS Inx2 RNAi/+*    
 *pdf; dcr > Inx2 RNAi*

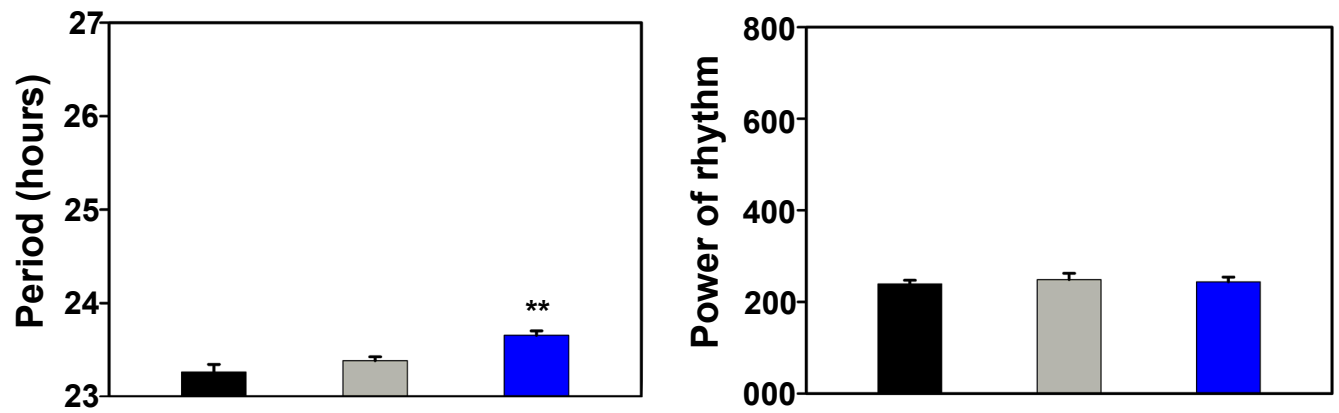**B**

*tim GAL4; pdf GAL80/+*    
  *UAS dcr; Inx2 RNAi/+*    
 *tim; pdf GAL80 > dcr; Inx2 RNAi*

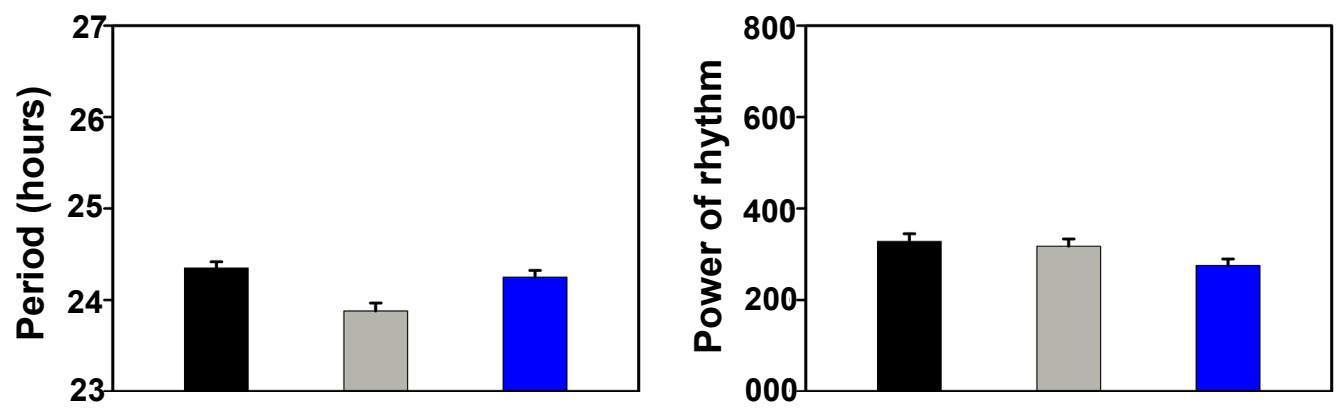

**Figure 2:** *Innexin2* knockdown in ventral lateral neurons lengthens free-running period.



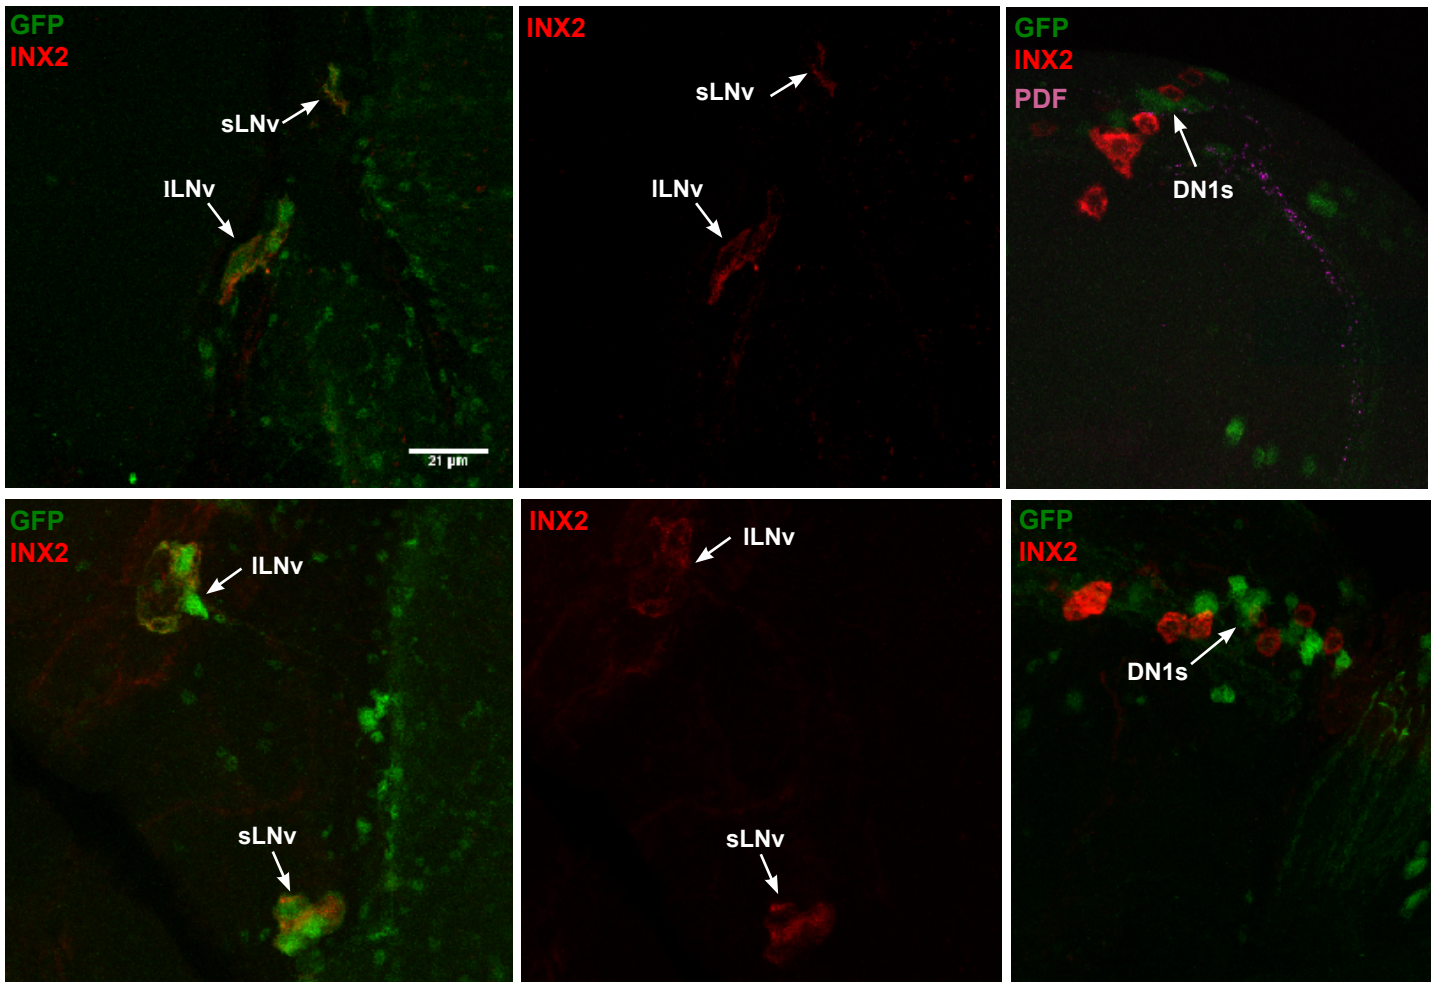

**Figure 3:** INNEXIN2 is localized to the small and large ventral lateral neurons in the circadian pacemaker circuit.

**A**

*tim GAL4; tub GAL80<sup>ts</sup>/+*
 *UAS dcr; Inx2 RNAi/+*
 *tim; tub GAL80<sup>ts</sup> > dcr; Inx2 RNAi*

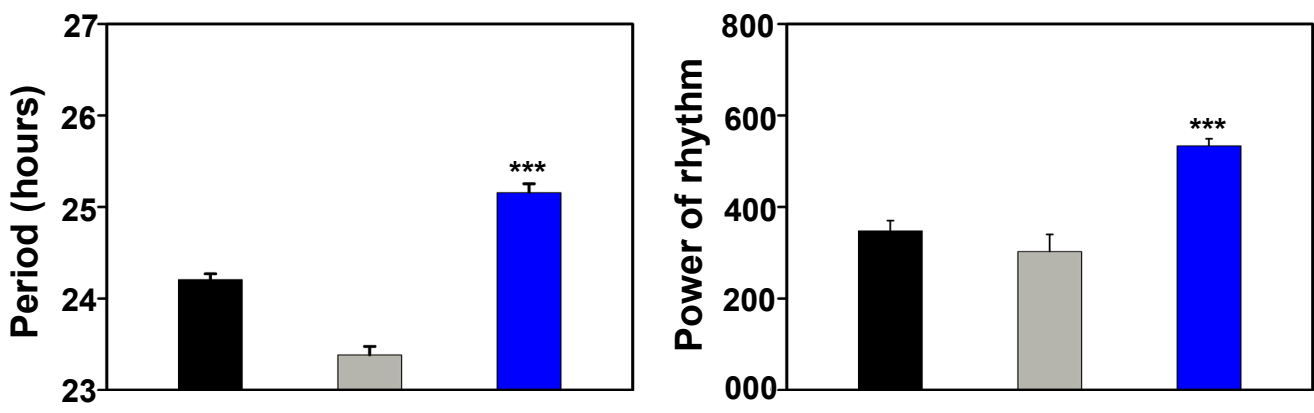**B**

*pdf GAL4; tub GAL80<sup>ts</sup>/+*
 *UAS dcr; Inx2 RNAi/+*
 *pdf; tub GAL80<sup>ts</sup> > dcr; Inx2 RNAi*

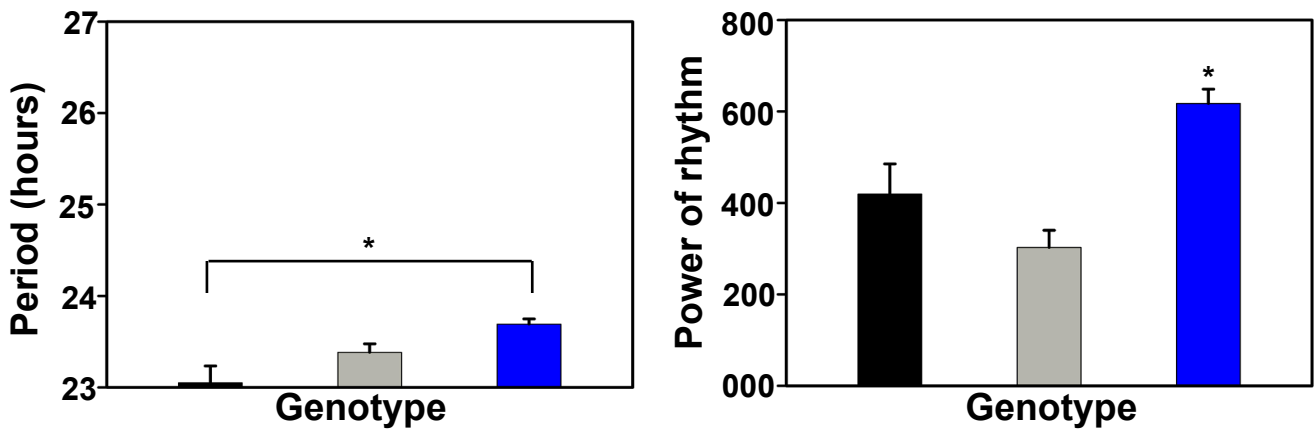

**Figure 4:** Period lengthening seen in case of *Innexin2* knockdown is not due to developmental defects.

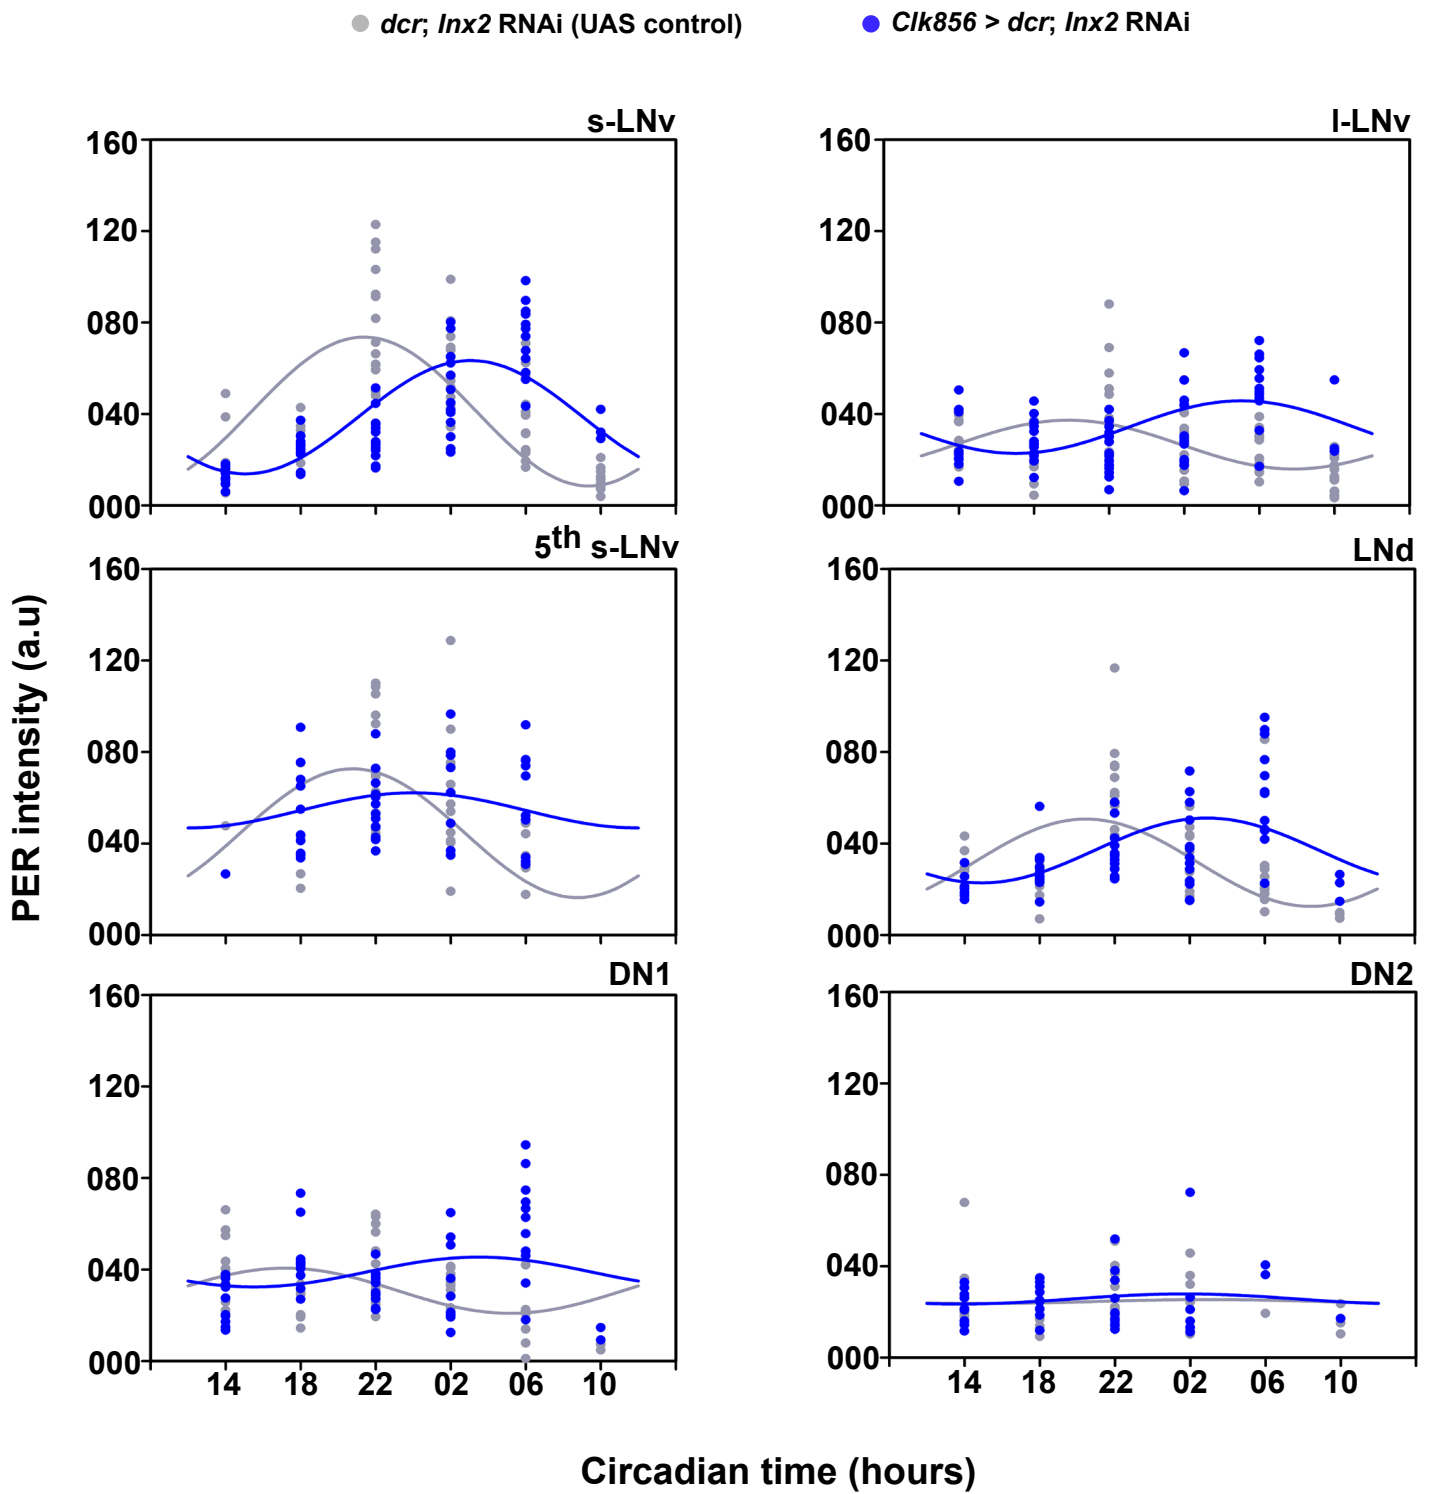

**Figure 5:** Knockdown of *Innexin2* delays the oscillation of PER in most clock neuronal subsets in the circadian pacemaker circuit.

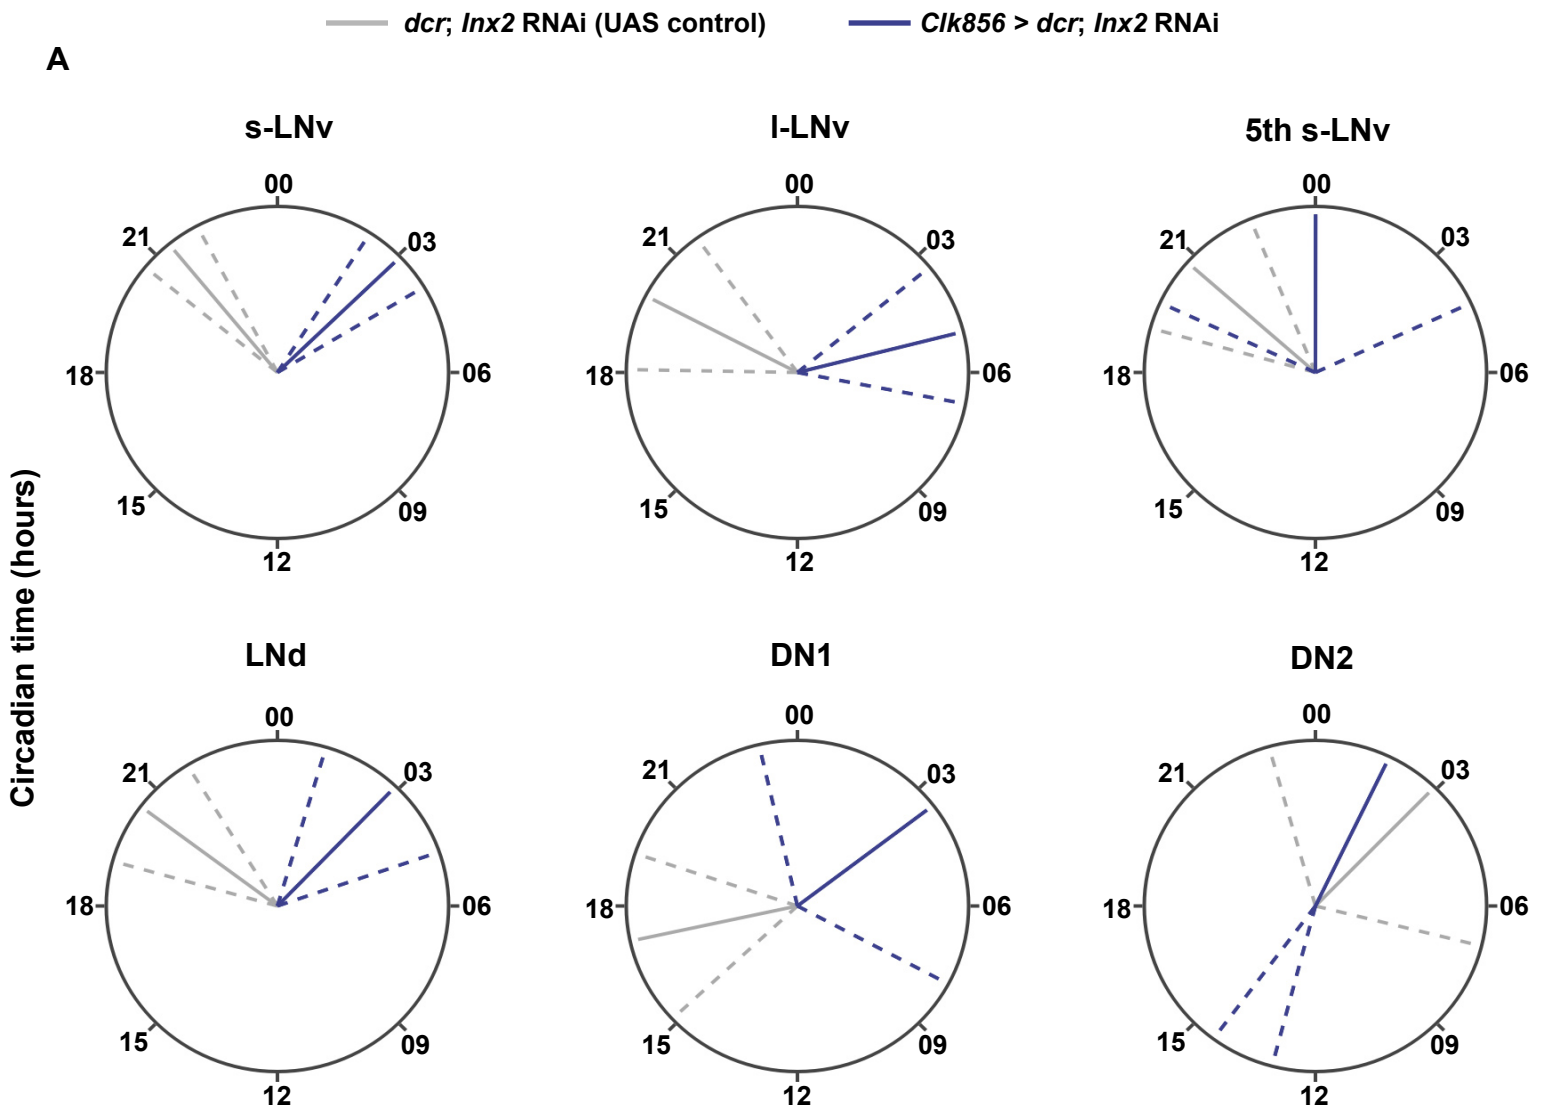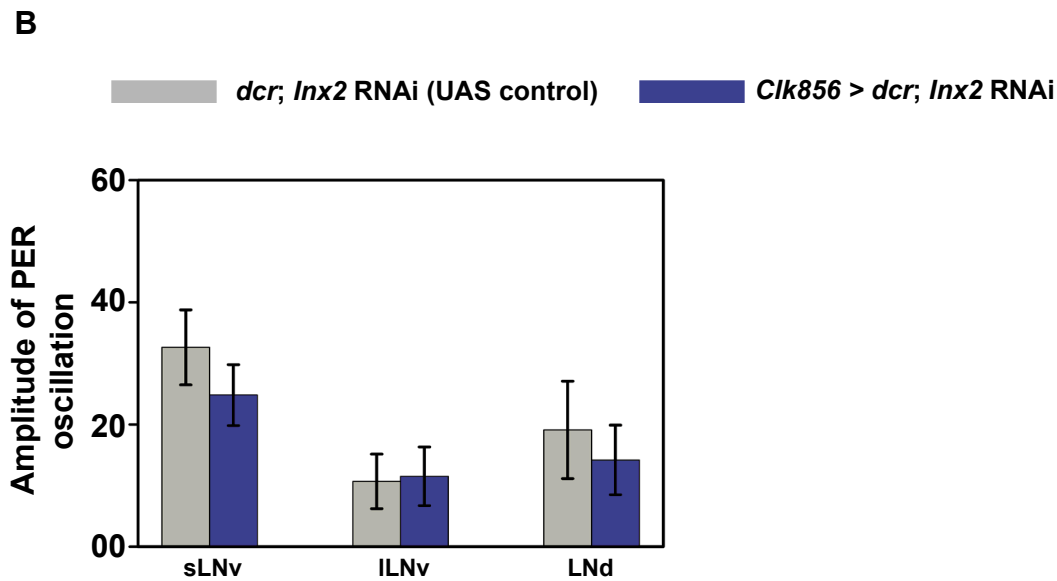

**Figure 6:** *Innexin2* knockdown affects the phase but not the amplitude of PER oscillation in the clock cells.

**A**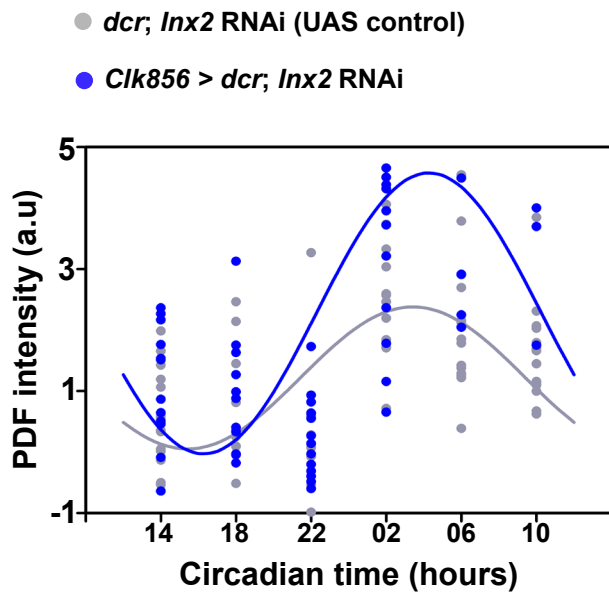**B**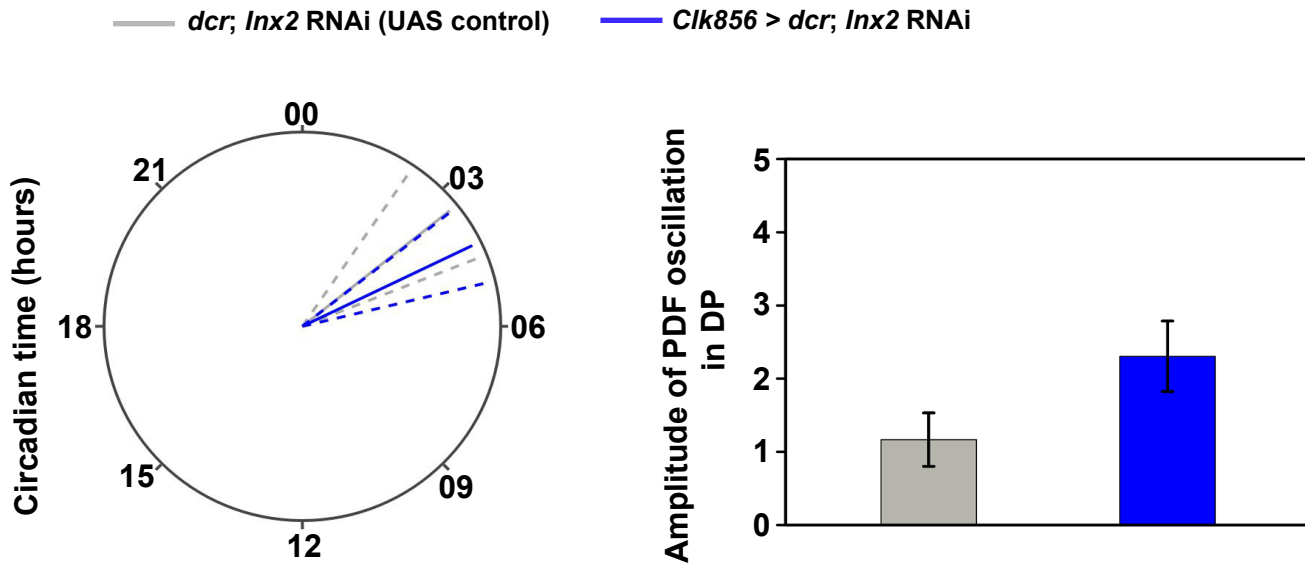

**Figure 7:** *Innexin2* knockdown affects the amplitude of PDF oscillation in the sLNv dorsal projection.
